# Supplementary material for: Adaptive venom evolution and toxicity in octopods is driven by extensive novel gene formation, expansion, and loss
Source: PubMed Central journal article supplement (PMC7656900; doi:10.1093/gigascience/giaa120), 2020-11-10
Supplement: giaa120_giga-d-20-00135_revision_1.pdf [file giaa120_giga-d-20-00135_revision_1.pdf]

# GigaScience

## Adaptive venom evolution and toxicity in octopods is driven by extensive novel gene formation, expansion and loss --Manuscript Draft--

|                                                      |                                                                                                                                                                                                                                                                                                                                                                                                                                                                                                                                                                                                                                                                                                                                                                                                                                                                                                                                                                                                                                                                                                                                                                                                                                                                                                                                                                                                                                                                                                                                                                                                                                                                                                                                                                                                                                                                                                                                                                                                                                                                                                        |                             |
|------------------------------------------------------|--------------------------------------------------------------------------------------------------------------------------------------------------------------------------------------------------------------------------------------------------------------------------------------------------------------------------------------------------------------------------------------------------------------------------------------------------------------------------------------------------------------------------------------------------------------------------------------------------------------------------------------------------------------------------------------------------------------------------------------------------------------------------------------------------------------------------------------------------------------------------------------------------------------------------------------------------------------------------------------------------------------------------------------------------------------------------------------------------------------------------------------------------------------------------------------------------------------------------------------------------------------------------------------------------------------------------------------------------------------------------------------------------------------------------------------------------------------------------------------------------------------------------------------------------------------------------------------------------------------------------------------------------------------------------------------------------------------------------------------------------------------------------------------------------------------------------------------------------------------------------------------------------------------------------------------------------------------------------------------------------------------------------------------------------------------------------------------------------------|-----------------------------|
| <b>Manuscript Number:</b>                            | GIGA-D-20-00135R1                                                                                                                                                                                                                                                                                                                                                                                                                                                                                                                                                                                                                                                                                                                                                                                                                                                                                                                                                                                                                                                                                                                                                                                                                                                                                                                                                                                                                                                                                                                                                                                                                                                                                                                                                                                                                                                                                                                                                                                                                                                                                      |                             |
| <b>Full Title:</b>                                   | Adaptive venom evolution and toxicity in octopods is driven by extensive novel gene formation, expansion and loss                                                                                                                                                                                                                                                                                                                                                                                                                                                                                                                                                                                                                                                                                                                                                                                                                                                                                                                                                                                                                                                                                                                                                                                                                                                                                                                                                                                                                                                                                                                                                                                                                                                                                                                                                                                                                                                                                                                                                                                      |                             |
| <b>Article Type:</b>                                 | Research                                                                                                                                                                                                                                                                                                                                                                                                                                                                                                                                                                                                                                                                                                                                                                                                                                                                                                                                                                                                                                                                                                                                                                                                                                                                                                                                                                                                                                                                                                                                                                                                                                                                                                                                                                                                                                                                                                                                                                                                                                                                                               |                             |
| <b>Funding Information:</b>                          | Australian Biological Resources Study (ref:RF211-41)                                                                                                                                                                                                                                                                                                                                                                                                                                                                                                                                                                                                                                                                                                                                                                                                                                                                                                                                                                                                                                                                                                                                                                                                                                                                                                                                                                                                                                                                                                                                                                                                                                                                                                                                                                                                                                                                                                                                                                                                                                                   | Assoc Prof Jan M. Strugnell |
|                                                      | Austrian Science Fund (FWF) grant (P30686-B29)                                                                                                                                                                                                                                                                                                                                                                                                                                                                                                                                                                                                                                                                                                                                                                                                                                                                                                                                                                                                                                                                                                                                                                                                                                                                                                                                                                                                                                                                                                                                                                                                                                                                                                                                                                                                                                                                                                                                                                                                                                                         | Prof Oleg Simakov           |
| <b>Abstract:</b>                                     | <p><b>Background</b></p> <p>Cephalopods represent a rich system for investigating the genetic basis underlying organismal novelties. This diverse group of specialized predators has evolved many adaptations including proteinaceous venom. Of particular interest is the blue-ringed-octopus genus ( <i>Hapalochlaena</i> ), which are the only octopods known to store large quantities of the potent neurotoxin, tetrodotoxin, within their tissues and venom gland.</p> <p><b>Findings</b></p> <p>To reveal genomic correlates of organismal novelties, we conducted a comparative study of three octopod genomes, including the Southern blue-ringed octopus ( <i>Hapalochlaena maculosa</i> ). We present the genome of this species and reveal highly dynamic evolutionary patterns at both non-coding and coding organizational levels. Gene family expansions previously reported in <i>Octopus bimaculoides</i> (e.g., zinc finger and cadherins, both associated with neural functions), as well as formation of novel gene families, dominate the genomic landscape in all octopods. Examination of tissue-specific genes in the posterior salivary gland (PSG) revealed that expression was dominated by serine proteases in non- tetrodotoxin bearing octopods, while this family was a minor component in <i>H. maculosa</i> . Moreover, voltage-gated sodium channels in <i>H. maculosa</i> contain a resistance mutation found in pufferfish and garter snakes, which is exclusive to the genus. Analysis of the PSG microbiome revealed a diverse array of bacterial species, including genera that can produce tetrodotoxin, suggestive of a possible production source.</p> <p><b>Conclusions</b></p> <p>We present the first tetrodotoxin-bearing octopod genome <i>H. maculosa</i>, which displays lineage-specific adaptations to tetrodotoxin acquisition. This genome, along with other recently published cephalopod genomes, represents a valuable resource from which future work could advance our understanding of the evolution of genomic novelty in this family.</p> |                             |
| <b>Corresponding Author:</b>                         | Brooke Lauren Whitelaw, Bachelor with Honours and current PhD candidate<br>James Cook University College of Science and Engineering<br>Townsville, QLD AUSTRALIA                                                                                                                                                                                                                                                                                                                                                                                                                                                                                                                                                                                                                                                                                                                                                                                                                                                                                                                                                                                                                                                                                                                                                                                                                                                                                                                                                                                                                                                                                                                                                                                                                                                                                                                                                                                                                                                                                                                                       |                             |
| <b>Corresponding Author Secondary Information:</b>   |                                                                                                                                                                                                                                                                                                                                                                                                                                                                                                                                                                                                                                                                                                                                                                                                                                                                                                                                                                                                                                                                                                                                                                                                                                                                                                                                                                                                                                                                                                                                                                                                                                                                                                                                                                                                                                                                                                                                                                                                                                                                                                        |                             |
| <b>Corresponding Author's Institution:</b>           | James Cook University College of Science and Engineering                                                                                                                                                                                                                                                                                                                                                                                                                                                                                                                                                                                                                                                                                                                                                                                                                                                                                                                                                                                                                                                                                                                                                                                                                                                                                                                                                                                                                                                                                                                                                                                                                                                                                                                                                                                                                                                                                                                                                                                                                                               |                             |
| <b>Corresponding Author's Secondary Institution:</b> |                                                                                                                                                                                                                                                                                                                                                                                                                                                                                                                                                                                                                                                                                                                                                                                                                                                                                                                                                                                                                                                                                                                                                                                                                                                                                                                                                                                                                                                                                                                                                                                                                                                                                                                                                                                                                                                                                                                                                                                                                                                                                                        |                             |
| <b>First Author:</b>                                 | Brooke Lauren Whitelaw                                                                                                                                                                                                                                                                                                                                                                                                                                                                                                                                                                                                                                                                                                                                                                                                                                                                                                                                                                                                                                                                                                                                                                                                                                                                                                                                                                                                                                                                                                                                                                                                                                                                                                                                                                                                                                                                                                                                                                                                                                                                                 |                             |
| <b>First Author Secondary Information:</b>           |                                                                                                                                                                                                                                                                                                                                                                                                                                                                                                                                                                                                                                                                                                                                                                                                                                                                                                                                                                                                                                                                                                                                                                                                                                                                                                                                                                                                                                                                                                                                                                                                                                                                                                                                                                                                                                                                                                                                                                                                                                                                                                        |                             |
| <b>Order of Authors:</b>                             | Brooke Lauren Whitelaw                                                                                                                                                                                                                                                                                                                                                                                                                                                                                                                                                                                                                                                                                                                                                                                                                                                                                                                                                                                                                                                                                                                                                                                                                                                                                                                                                                                                                                                                                                                                                                                                                                                                                                                                                                                                                                                                                                                                                                                                                                                                                 |                             |

|                                                |                                                                                                                                                                                                                                                                                                                                                                                                                                                                                                                                                                                                                                                                                                                                                                                                                                                                                                                                                                                                                                                                                                                                                                                                                                                                                                                                                                                                                                                                                                                                                                                                                                                                                                                                                                                                                                                                                                                                                                                                                                                                                                                                                                                                                                                                                                                                                                                                                                                                                                                                                                                                                                                                                                                                                                                                                                                                                                                                             |
|------------------------------------------------|---------------------------------------------------------------------------------------------------------------------------------------------------------------------------------------------------------------------------------------------------------------------------------------------------------------------------------------------------------------------------------------------------------------------------------------------------------------------------------------------------------------------------------------------------------------------------------------------------------------------------------------------------------------------------------------------------------------------------------------------------------------------------------------------------------------------------------------------------------------------------------------------------------------------------------------------------------------------------------------------------------------------------------------------------------------------------------------------------------------------------------------------------------------------------------------------------------------------------------------------------------------------------------------------------------------------------------------------------------------------------------------------------------------------------------------------------------------------------------------------------------------------------------------------------------------------------------------------------------------------------------------------------------------------------------------------------------------------------------------------------------------------------------------------------------------------------------------------------------------------------------------------------------------------------------------------------------------------------------------------------------------------------------------------------------------------------------------------------------------------------------------------------------------------------------------------------------------------------------------------------------------------------------------------------------------------------------------------------------------------------------------------------------------------------------------------------------------------------------------------------------------------------------------------------------------------------------------------------------------------------------------------------------------------------------------------------------------------------------------------------------------------------------------------------------------------------------------------------------------------------------------------------------------------------------------------|
|                                                | Ira R. Cooke                                                                                                                                                                                                                                                                                                                                                                                                                                                                                                                                                                                                                                                                                                                                                                                                                                                                                                                                                                                                                                                                                                                                                                                                                                                                                                                                                                                                                                                                                                                                                                                                                                                                                                                                                                                                                                                                                                                                                                                                                                                                                                                                                                                                                                                                                                                                                                                                                                                                                                                                                                                                                                                                                                                                                                                                                                                                                                                                |
|                                                | Julian Finn                                                                                                                                                                                                                                                                                                                                                                                                                                                                                                                                                                                                                                                                                                                                                                                                                                                                                                                                                                                                                                                                                                                                                                                                                                                                                                                                                                                                                                                                                                                                                                                                                                                                                                                                                                                                                                                                                                                                                                                                                                                                                                                                                                                                                                                                                                                                                                                                                                                                                                                                                                                                                                                                                                                                                                                                                                                                                                                                 |
|                                                | Rute R. da Fonseca                                                                                                                                                                                                                                                                                                                                                                                                                                                                                                                                                                                                                                                                                                                                                                                                                                                                                                                                                                                                                                                                                                                                                                                                                                                                                                                                                                                                                                                                                                                                                                                                                                                                                                                                                                                                                                                                                                                                                                                                                                                                                                                                                                                                                                                                                                                                                                                                                                                                                                                                                                                                                                                                                                                                                                                                                                                                                                                          |
|                                                | Elena A. Ritschard                                                                                                                                                                                                                                                                                                                                                                                                                                                                                                                                                                                                                                                                                                                                                                                                                                                                                                                                                                                                                                                                                                                                                                                                                                                                                                                                                                                                                                                                                                                                                                                                                                                                                                                                                                                                                                                                                                                                                                                                                                                                                                                                                                                                                                                                                                                                                                                                                                                                                                                                                                                                                                                                                                                                                                                                                                                                                                                          |
|                                                | M. T P. Gilbert                                                                                                                                                                                                                                                                                                                                                                                                                                                                                                                                                                                                                                                                                                                                                                                                                                                                                                                                                                                                                                                                                                                                                                                                                                                                                                                                                                                                                                                                                                                                                                                                                                                                                                                                                                                                                                                                                                                                                                                                                                                                                                                                                                                                                                                                                                                                                                                                                                                                                                                                                                                                                                                                                                                                                                                                                                                                                                                             |
|                                                | Oleg Simakov                                                                                                                                                                                                                                                                                                                                                                                                                                                                                                                                                                                                                                                                                                                                                                                                                                                                                                                                                                                                                                                                                                                                                                                                                                                                                                                                                                                                                                                                                                                                                                                                                                                                                                                                                                                                                                                                                                                                                                                                                                                                                                                                                                                                                                                                                                                                                                                                                                                                                                                                                                                                                                                                                                                                                                                                                                                                                                                                |
|                                                | Jan M. Strugnell                                                                                                                                                                                                                                                                                                                                                                                                                                                                                                                                                                                                                                                                                                                                                                                                                                                                                                                                                                                                                                                                                                                                                                                                                                                                                                                                                                                                                                                                                                                                                                                                                                                                                                                                                                                                                                                                                                                                                                                                                                                                                                                                                                                                                                                                                                                                                                                                                                                                                                                                                                                                                                                                                                                                                                                                                                                                                                                            |
| <b>Order of Authors Secondary Information:</b> |                                                                                                                                                                                                                                                                                                                                                                                                                                                                                                                                                                                                                                                                                                                                                                                                                                                                                                                                                                                                                                                                                                                                                                                                                                                                                                                                                                                                                                                                                                                                                                                                                                                                                                                                                                                                                                                                                                                                                                                                                                                                                                                                                                                                                                                                                                                                                                                                                                                                                                                                                                                                                                                                                                                                                                                                                                                                                                                                             |
| <b>Response to Reviewers:</b>                  | <p>Dear Dr. Hongling Zhou</p> <p>On behalf of my co-authors, I would like to thank you for the opportunity to revise and resubmit our research piece titled "Adaptive venom evolution and toxicity in octopods is driven by extensive novel gene formation, expansion and loss" (GIGA-D-20-00135).</p> <p>We would also like thank all three reviewers for their constructive criticism and advice on how to improve our manuscript. All suggestions have been taken into account and incorporated resulting in a much-improved manuscript.</p> <p>A response to reviewers has been provided in which we address each point providing the original text followed by the revised text, including line numbers where changes have been implemented. We also included a low resolution version of all corrected figures in the response.</p> <p>Thank you again for your consideration of our revised manuscript</p> <p>Yours sincerely,<br/>Brooke L. Whitelaw</p> <p>Reviewer reports:</p> <p>Reviewer #1: The manuscript describes the genome of the southern blue-ringed octopus and provides comparisons between this genome and previously published octopus genomes, with a particular focus on venom. I did not see any major flaws in the paper, which I think will be a valuable contribution to the cephalopod genomics literature. The blue-ringed octopuses are of major interest due to their highly toxic venom, and I found the comparisons between this species and others in terms of venom production and resistance to be quite illuminating (though somewhat unsurprising, given what we already knew about the use of TTX by this species).</p> <p>I found the paper to be fairly well written, though I do have several questions and comments that I hope will help clarify some issues. I will list those below, in the order I encountered them as I read the manuscript and supplementary materials. My only somewhat substantive concern first struck me as I read page 17 of the manuscript: "...suggesting a species-specific expansion of this cluster in <i>C. minor</i>". I think the authors should be a bit more careful with how they use the phrase "species-specific". They have included only three octopod species out of 300+ species in this study. Yes, any differences they detect between these species could be species specific, but I think it is more likely that the differences arose in ancestral lineages. For example, expansion of the serine protease cluster may have occurred only in <i>C. minor</i>, but it could also have occurred in the ancestor of <i>Callistoctopus</i>, or in some other ancestor. At present, the authors do not have sufficient sampling to know if any of the expansions, losses, shifts in expression, etc., they are seeing are truly species specific. Similarly, sentences like "Loss of serine protease genes can also be observed in <i>H.</i></p> |

maculosa". The authors can certainly state that *H. maculosa* has fewer serine protease genes than *O. bimaculoides* and *C. minor*, but the \*loss\* of these genes may have occurred in *H. maculosa* \*or\* in any ancestral lineage after the divergence of *Hapalochlaena* from *Octopus*. I urge the authors to go through their manuscript carefully to find instances where they have evidence of differences among these species and to check that their descriptions of differences among these species are clear.

We agree with the reviewer and have carefully read through the manuscript and corrected sections where species-specific inferences were made to prevent miscommunication of the findings.

Original text:

"Loss of serine protease genes can also be observed in *H. maculosa*"

Revised text: (pg. 18, line: 315)

"Fewer serine protease genes can also be observed in *H. maculosa*"

Original text:

"The greatest proportion of genes in each species examined were not specific to octopods or an octopus species (ancient genes) (Fig 2a). Expression of these genes were enriched in neural tissues across all species, indicating the core conservation of neural development and function. However, we also find that genes specific to each octopod species also show this expression pattern"

Revised text: (pg. 13-14 , lines: 231-235)

"The greatest proportion of genes in each species examined were not specific to octopods or an octopus lineage (ancient genes) (Fig 2a). Expression of these genes were enriched in neural tissues across all species, indicating the core conservation of neural development and function. However, we also find that genes specific to each octopod lineage also show this expression pattern"

Original text:

"Absence of gene expression for genes whose orthologs have retained expression in one or more other species suggests a unique evolutionary trajectory from other octopods. It should be noted that differences in tissue sampling may in part influence these values."

Revised text: (pg. 14, lines: 244-249)

"Absence of gene expression for genes whose orthologs have retained expression in one or more other species suggests a unique evolutionary trajectory from other octopods. It should be noted that differences in tissue sampling may in part influence these values and due to the limited sampling of species, loss of expression cannot be inferred at a species level and may have occurred at any point in the lineage."

We have also removed the term 'species-specific' and replaced it with the more accurate term 'lineage-specific' to avoid confusion. : (pg. 2, line: 45) , (pg. 10, line: 178), (pg. 13, line:229), (pg. 13, line: 224), (pg. 14, line: 239), (pg. 15, line: 255), (pg. 18, line: 314), (pg. 34, line: 589) & (pg. 35, line: 601)

Figure 2 has also been corrected to replace 'species specific' with 'lineage specific'. Low quality version shown here. The corrected version has been uploaded to replace the original

Minor points and suggestions

Check for subject-verb agreement in the abstract. For example, it should be "This diverse group of specialised (sic) predators has evolved..." (the subject is "group", not "predators").

We have corrected the spelling of 'specialised' and have replaced 'have' with 'has' (pg

1, lines: 24).

Abstract: Last sentence might be better as "This genome, along with other recently published cephalopod genomes, represents a valuable resource from which future work could advance our understanding of the evolution of genomic novelty in this family"

We agree that this sentence would fit better at the end of the abstract and have corrected this.

Original sentence:

"This genome along with other recently published cephalopod genomes represent a valuable resource from which future work could advance the evolution of genomic novelty within the family."

Revised sentence (pg. 2, lines: 45-48):

"This genome, along with other recently published cephalopod genomes, represents a valuable resource from which future work could advance our understanding of the evolution of genomic novelty in this family"

Pg. 3: "underrepresented" - Underrepresented in what sense? In terms of genomic resources?

When we used the term underrepresented, we were referring to the lack of published genomes for cephalopods. This has been slowly changing since the publication of the first cephalopod genome in 2015 by Albertin et al. The sentence has been modified to clarify this.

Original sentence:

"The recent publication of octopod genomes provides an opportunity to investigate the link between genomic and organismal evolution in this unique and underrepresented lineage"

Revised sentence: (pg. 3 ,lines: 52-55).

"The recent publication of octopod genomes provides an opportunity to investigate the link between genomic and organismal evolution in this unique lineage for which genomic resources have been lacking.<sup>1</sup>"

Pg. 3: (FAO, ) - Looks like a typo? Or incomplete switch to a different citation format?

Corrected (pg. 3 ,line: 57)

Pg. 3: "soft bodied" should be "soft-bodied"

Corrected (pg. 3 ,line: 58)

Pg. 3: Should be "that are well adapted" (no hyphen)

Corrected (pg. 3 ,line: 58)

Pg. 4: "How resistance to TTX" - This is not totally clear as written. Resistance in what? I think the authors are referring to how *Hapalochlaena* avoids being killed by its own TTX, but this could be rephrased to make it crystal clear. Also "remains a large unknown" is a little awkward...maybe "remains largely unknown" would be better?

We agree that this sentence was unclear. Reviewer 3 also suggested that due the recent publication by Geffeney et al (2019) this sentence was no longer reflective of the current literature. In order to correct this we have updated this sentence to reflect the latest literature and taken care to ensure the sentences are clear.

Original sentence:

"How resistance to TTX has been acquired at the genetic level, remains a large unknown, with TTX resistance studied in only in a few select species (i.e. pufferfish<sup>13</sup>, newts<sup>14,15</sup> and gastropods<sup>16</sup>)."



Revised sentences (pg. 4, lines: 74-79):

"The mechanism of TTX resistance, which allows for safe sequestration of TTX, has been attributed to several substitutions in the p-loop regions of voltage-gated sodium channels(Nav) in *H. lunulata*<sup>24</sup>. However, these channels have yet to be examined in *H. maculosa* and *H. fasciata*. TTX resistance has also been studied in a range of other genera including, pufferfish<sup>25</sup>, newts<sup>26,27</sup> arachnids<sup>28</sup>, snakes<sup>29</sup> and gastropods<sup>30</sup>"

Pg. 4: "Primarily used for defense..." - Awkward sentence with a dangling modifier, which makes it read as though *Hapalochlaena* is primarily used for defense in other species.

We agree that this was a poor choice of wording and this sentence has been clarified as follows:

Original sentence:

"Primarily used for defense in other unrelated TTX-bearing species, *Hapalochlaena* is the only known taxa to utilise TTX in venom"

Revised sentence (pg. 4-5,lines: 82-84):

"While other unrelated TTX-bearing species primarily use TTX for defense, *Hapalochlaena* is the only known taxa to utilise TTX in venom<sup>23,35</sup>."

Pg. 5: "for example at the evolution of venoms" - Somewhat awkward, I think?

We agree and have modified the sentence to improve flow as follows:

Original sentence:

"By using a comparative genomic approach we are able to examine the emergence of octopod novelties, for example at the evolution of venoms, at a molecular level between *H. maculosa* and the two non-TTX bearing octopods: the California two-spot octopus (*O. bimaculoides*) and the long-armed octopus (*Callistoctopus minor*), while also addressing the species-specific evolution of tetrodotoxin acquisition and resistance in *H. maculosa*"

Revised sentence (pg. 5 ,lines: 93-98):

"By using a comparative genomic approach we are able to examine the emergence of octopod novelties, at a molecular level between *H. maculosa* and the two non-TTX bearing octopods: the California two-spot octopus (*O. bimaculoides*) and the long-armed octopus (*Callistoctopus minor*). We also address unique features of venom evolution in octopods while also addressing the species-specific evolution of tetrodotoxin acquisition and resistance in *H. maculosa*"

Pg. 6: Capitalize "bay"? (Port Phillip Bay)

Corrected (pg. 6, line: 108)

Pg. 7: Should be "shallow-water marine organisms".

Corrected (pg. 8, lines: 139)

Pg. 8: Should be "Southern Hemisphere".

Corrected (pg. 8, line: 142-143)

Pg. 8: Also here, how did they do their divergence time estimation?

Tanner et al. (2017) used a Bayesian approach to estimate divergence times, analyzing a concatenated alignment of 197 genes with Phylobayes. These details have been incorporated into the manuscript.

Original sentence:

"Previous phylogenies using a combination of a small number of mitochondrial and

nuclear genes<sup>46-48</sup> and orthologs derived from transcriptomes<sup>49</sup> support this topology. Likewise, divergence of the *H. maculosa* from *Abdopus aculeatus* has been previously estimated to be ~59 mya<sup>2</sup>

Modified sentence (pg. 9, lines: 151-155) :

"Previous phylogenies using a combination of a small number of mitochondrial and nuclear genes<sup>49-51</sup> and orthologs derived from transcriptomes<sup>52</sup> support this topology. Likewise, estimates by Tanner et al.<sup>2</sup>, using a concatenated alignment of 197 genes with a Bayesian approach, placed divergence of *H. maculosa* from *Abdopus aculeatus* at ~59 mya<sup>2</sup>."

Pg. 8: "*maculosa* from *Abdopus*" - "from" should not be italicized.

Corrected (pg. 9, line: 154)

Pg. 9: "sporadic occurrence" - I think the authors mean sporadic taxonomically here (i.e., some species have them, some do not), but this should be clarified (surely the authors don't mean that sometimes a given species has them and sometimes they don't!).

In order to prevent confusion the sentence has been modified to include the term "taxonomically sporadic".

Original sentence

"Morphological variations of ocelli structure and colour, along with their sporadic occurrence within *Octopus* and *Amphioctopus*<sup>3</sup>, limits our interpretation as to the evolutionary history of this trait in octopods"

Revised sentence: (pg. 9, lines: 160-163):

"Morphological variations of ocelli structure and colour, in conjunction with the taxonomically sporadic occurrence of this trait across species within *Octopus* and *Amphioctopus*, limits our interpretation as to the evolutionary history of this trait in octopods."

Pg. 11: Just a suggestion here: "splicing, embryonic and neural development" is clear, but it looks odd. How about "splicing and embryonic and neural development" or "splicing as well as embryonic and neural development".

We have modified the sentence as suggested:

Original sentence:

"*H. maculosa* also shows expansions in the C2H2-type zinc finger family. Zinc fingers form an ancient family of transcription factors, which among other roles serve to regulate transposon splicing, embryonic and neural development<sup>45,46</sup>."

Revised sentence: (pg. 12 ,lines: 207-09)

"*H. maculosa* also shows expansions in the C2H2-type zinc finger family. Zinc fingers form an ancient family of transcription factors, which among other roles serve to regulate transposon splicing as well as embryonic and neural development<sup>69,70</sup>."

Pg. 11: Should be "this type of zinc finger in *O. bimaculoides*"

Corrected (pg. 12, line: 210)

Pg. 12: "High level examination" should be "High-level examination", "large scale expression patterns" should be "large-scale expression patterns", and "lineage specific loss" should be "lineage-specific loss".

Corrected (pg. 13, lines: 227 & 230)

Pg. 12: Unnecessary comma in "we also find that, genes specific to each octopod"

Corrected (pg.13, line: 234)

Pg. 13: "in tandem with overall reduction in genes number relative to the octopods" - This is unclear and poorly worded. I assume this is referring still to *H. maculosa* relative to other octopods?

In order to improve the clarity and wording of this sentence it has been rephrased as follows:

Original sentence:

"In order to understand the implications of gene expression loss, in tandem with overall reduction in genes number relative to the octopods, further investigation is required."

Revised sentence: (pg. 14, lines: 249-251)

"In order to fully understand the implications of the gene family contractions and loss of expression in *H. maculosa*, relative to other octopods, further investigation is required."

Pg. 15: Unnecessary comma in "More notable, were differences"

Corrected (pg. 17, line: 288)

Pg. 16: Should be "primary venom-producing gland".

Corrected (pg. 17, line: 296)

Pg. 16: *Haplochlæna* should be italicized in "hypothesized that the *Haplochlæna* PSF..." Also, who has hypothesized that the *Haplochlæna* PSF will exhibit a loss of redundant proteinaceous toxins? This seems to call for a citation.

This statement was poorly worded and has been corrected to reflect that we proposed the hypothesis. *Haplochlæna* has also been italicized.

Original sentence:

"It has been hypothesized that the *Haplochlæna* PSG will exhibit a loss of redundant proteinaceous toxins due to the presence of TTX."

Revised sentence: (pg. 17, lines: 299-300)

"We hypothesize that the *Haplochlæna* PSG will exhibit a loss of redundant proteinaceous toxins due to the presence of TTX."

Pg. 16: "A total of 623 genes were exclusive to *H. maculosa* PSG...exclusive to *O. bimaculoides* and *C. minor*, respectively". Should this be "exclusive to the *O. bimaculoides* and *C. minor* PSGs, respectively"?

Yes the reviewer is correct. This sentence has been corrected as suggested.

Original sentence:

"A total of 623 genes were exclusive to *H. maculosa* PSG compared to only 230 and 164 exclusive to *O. bimaculoides* and *C. minor*, respectively"

Revised sentence (pg.17-18, lines 302-304)

"A total of 623 genes were exclusive to *H. maculosa* PSG compared to only 230 and 164 exclusive to *O. bimaculoides* and *C. minor* PSGs, respectively."

Pg. 16: "Additionally, *H. maculosa* PSG is predicted to be" - Predicted by whom? The authors? I think so, so they should make that clear, e.g., "we predict that the *H. maculosa* PSG is functionally more diverse..."

This sentence has been corrected as suggested:

Revised sentence (pg. 18, lines: 304-306)

"Additionally, we predict that the *H. maculosa* PSG is functionally more diverse based on the number of Pfam families detected, 532 in total."

Pg. 17: The sentence about reprodysin doesn't make sense to me. The authors

describe shifting expression in this species (see my comment above) but then note that there is a complete loss of orthologs from the genome. This latter comment suggests that reprotolysin doesn't even exist in the *H. maculosa* genome, but it must, if it is showing different expression patterns than the other species. Can the authors clarify this?

The sentence that "there is a complete loss of orthologs from the genome" was incorrect. It should have read "there is a complete loss of paralogs from the genome". This has been corrected in the sentence below.

Revised sentence (pg. 18, lines: 316-318)

"Similarly, reprotolysin (M12B) exhibits shifting expression in *H. maculosa*, presumably from the PSG to the branchial heart, and a complete loss of paralogs from the genome."

Pg. 18: "the cephalopod specific clade" should be "cephalopod-specific clade".

Corrected (pg. 19, line: 324)

Pg. 18: "...hyaluronidase, which often serve as dispersal factors" seems odd. Should this be "hyaluronidase, which often serves as a dispersal factor"?

Yes and we have modified the sentence as suggested.

Original sentence:

"Previous proteomic analysis of the *H. maculosa* PSG revealed high expression of hyaluronidase, which often serve as dispersal factors within snake venom, facilitating the spread of toxin while not being directly toxic to their prey<sup>9,72</sup>"

Revised sentence: (pg. 19, lines: 330-333)

"Previous proteomic analysis of the *H. maculosa* PSG revealed high expression of hyaluronidase, which often serves as a dispersal factor within snake venom, facilitating the spread of toxin while not being directly toxic to their prey<sup>9,72</sup>."

Pg. 19: "Two Nav genes"...should the "v" be a subscript here?

Corrected (pg. 20, line: 352)

Pg. 19: "latter regions in DIII and DIV" - Is "latter" the best adjective here?

"Latter" is not an ideal word choice and the sentence has been modified.

Original sentence:

"The latter regions in DIII and DIV"

Revised sentence: (pg. 21, line: 356)

"The regions DIII and DIV closer to the C-terminal end of the protein"

Pg. 20: "In previous studies, when examined individually, the Met- Thr substitution in a TTX sensitive Nav1.4 rat channel decreased binding affinity in pufferfish by 15-fold" - This could be more clear. A "rat channel"? As in, a channel in rats? But the sentence says "in pufferfish". Please clarify this.

Jost et al 2008 found a Met-Thr substitution in the third p-loop region of a pufferfish sodium channel. This substitution was induced in a TTX sensitive rat channel through site-directed mutagenesis and the rat channel was then expressed in the oocytes of the African clawed frog (*Xenopus*). In our original sentence some of these taxonomical/methodological details obscured the ultimate finding which is the introduction of a Met-Thr substitution, in an otherwise TTX-sensitive channel, inhibits TTX binding by 15-fold. Our revised sentence has removed reference to taxonomy to convey the main finding more clearly.

Original sentence:

"In previous studies, when examined individually, the Met- Thr substitution in a TTX

sensitive Nav1.4 rat channel decreased binding affinity in pufferfish by 15-fold"

Revised sentence (pg. 21,lines: 365-366):

"In a previous study a Met to Thr substitution into a TTX sensitive Nav1.4 channel decreased binding affinity to TTX by 15-fold<sup>87</sup>."

Pg. 21: "It has yet to be established if these mutations are derived from a shared ancestor or have occurred independently" - Excellent. This is exactly the clarity I think the authors can bring to their other statements about gains, losses, etc. that I pointed out in a previous comment.

As detailed in the first response to reviewers we have clarified these statements throughout.

Pg. 21: I would write "While Hapalochlaena remains" here.

Corrected (pg. 22 ,line: 379)

Pg. 21: Should be "STX-contaminated bivalves" (and "STX-contaminated fish" and "STX-contaminated food sources" below...and "TTX-producing bacteria" and "TTX-producing strains" on pg. 23).

Corrected (pg. 22-24, lines: 383, 391-392, 394, 416, 422)

Pg. 21: "Humboldt" should be capitalized, as it is a proper name.

Corrected (pg. 18, line: 389, 391)

Pg. 23: "Sequestration of TTX is not exclusive to the blue-ringed octopus among molluscs. Gastropods such as Pleurobranchaea maculata and Niotha clathrata, as well as some bivalves, are capable of sequestering the similar toxin STX " - TTX and STX are similar, but not the same. Are there other examples of actual TTX sequestration in molluscs, outside of Hapalochlaena? If not, this should be rephrased.

Yes, sequestration of TTX does occur in molluscs aside from Hapalochlaena, including but not necessarily limited to the gastropods Pleurobranchaea maculata and Niotha clathrata. In the original sentence we mistakenly said these species were capable of sequestering STX as opposed to TTX. This has been corrected in the revised sentence.

Original sentence:

"Gastropods such as Pleurobranchaea maculata and Niotha clathrata, as well as some bivalves, are capable of sequestering the similar toxin STX"

Revised sentence: (pg. 24 ,lines: 409-420)

"Gastropods such as Pleurobranchaea maculata and Niotha clathrata, as well as some bivalves, are also capable of sequestering TTX"

Pg. 23: "highly diverse composition of genera" may be better as "highly diverse composition of bacterial genera"

Corrected (pg. 24, lines: 413)

Pg. 23: "Diversity of bacterial genera much like the H. maculosa in this study was high" - This seems awkward and unclear."

This sentence was unclear and has been modified to:

Original sentence:

"Diversity of bacterial genera much like the H. maculosa in this study was high and this may complicate identification of species responsible for TTX production"

Revised sentence (pg. 25 , lines: 423-425):

"Congruent with our findings the diversity of bacterial genera was high and this may

complicate identification of species responsible for TTX production”

Pg. 24: "TTX bearing mollusk genome" - Hmm...does the genome bear TTX? The mollusk does, I suppose, but it's produced by bacteria as described above. This could be rephrased.

The sentence has been rephrased to improve clarity to:

Original sentence:

“This work describes the genome of a unique TTX bearing mollusc genome, the southern blue-ringed octopus (*Hapalochlaena maculosa*).”

Revised sentence (pg. 25 ,lines: 434-435):

“This work describes the genome of a unique TTX bearing mollusc, the southern blue-ringed octopus (*Hapalochlaena maculosa*).”

Pg. 28: What kit or method was used to construct the cDNA libraries for transcriptome sequencing?

Construction of cDNA libraries was outsourced to AGRF (Australian Genome Research Facility), Melbourne, and conducted using their TruSeq mRNA Library Prep with polyA selection and unique dual indexing method. This information has been included in the methods section “Transcriptome sequencing”

Revised text: (pg. 29, lines: 499-504)

“Construction of cDNA libraries was outsourced to AGRF (Australian Genome Research Facility), Melbourne and conducted using their TruSeq mRNA Library Prep with polyA selection and unique dual indexing method. Libraries were constructed using 3 µg of RNA at a concentration of >100 ng/µ L. Each tissue was sequenced on 1/12th of an Illumina HiSeq2000 lane with one lane used in total.”

Pg. 30: Which assemblies of the molluscan genomes (*Crassostrea*, etc.) were used? Where did the transcriptomes for *Sepia* and *Idiosepius* come from? Were reads downloaded from the NCBI SRA and assembled in Trinity? If so, what were the BioProject numbers for the transcriptome data?

We have modified the methods section “Calibration of sequence divergence with respect to time” to include details as to the origin of both the transcriptomes and the genomes used in this study.

Revised text: (pg. 31-32, lines: 539-546)

Bioprojects for each genome used are as follows:*Crassostera gigas* (PRJNA629593 & PRJEB3535), *Lottia gigantea* (PRJNA259762 & PRJNA175706), *Aplysia californica* (PRJNA629593 & PRJNA13635) and (*Euprymna scolopes* PRJNA47095). *Octopus bimaculoides* was obtained from [http://octopus.unit.oist.jp/OCTDATA/BASIC/Metazome/Obimaculoides\\_280.fa.gz](http://octopus.unit.oist.jp/OCTDATA/BASIC/Metazome/Obimaculoides_280.fa.gz). The *Idiosepius notoides* (BioProject: PRJNA302677) transcriptome was sequenced and assembled using the same method previously described for the *H. maculosa* transcriptome.

Pg. 32: I think when the authors write "*H. maculosa* is a single generation species", they mean that it is semelparous, but I don't see why that is relevant for mutation rate calculations.

We completely agree that this has little impact on mutation rate (measured per generation). This was included in an early draft (that discussed the coalescent demographic analyses in more detail) and was kept in by mistake. The text has been revised to remove “*H. maculosa* is a single generation species”

Original sentence:

“Per base neutral substitution between lineages was determined using the mean dS value divided by divergence time (refer to Calibration of sequence divergence with respect to time) usually over number of generations, however *H. maculosa* is a single generation species”

Revised sentence: (pg. 34, lines: 575-577)

“Per base neutral substitution between lineages was determined using the mean dS value divided by divergence time (refer to Calibration of sequence divergence with respect to time) over the number of generations.”

Pg. 33: "genes with expression within one or more tissues was determined" should be "...were determined".

Corrected (pg. 35, line: 592).

Pg. 34: Something is strange in this sentence - "A loss of expression requires a gene to be present in all three octopods with and expressed in one or more species while having no detectable expression in at least one species" (an extra "with"?)

Corrected (pg. 35, lines: 602-604).

Pg. 34: Individual mutation with potential" should be "mutations"

Corrected (pg. 36, line: 613-614).

Figure 5: *Loligo pealei* and *Doryteuthis pealeii* are the same species. The latter name is the correct one.

Figure 5 has been corrected by removing the duplicate sequence and retaining the correct name *Doryteuthis pealeii*

Low quality version shown here. The corrected version has been uploaded to replace the original

#### Supplementary Material

4.1: a) What models and settings were used in RAXML and PhyloBayes?

b) How were those models chosen?

c) What calibrations were used for the divergence time analysis?

d) How was convergence inferred for the PhyloBayes run?

e) Also, Supplementary Figure 3 is a "QITREE" tree...do the authors mean IQ-TREE? If so, why is IQ-TREE not mentioned in the text? This tree also differs slightly from the tree presented in Figure 1a, though I doubt the difference is of any consequence for this paper.

In order to clearly address the points raised by Reviewer1, we have answered each question separately.

a) The models chosen for RaxML and Phylobayes were GTR+G+I and strict clock with a mixture model of F81 + G respectively.

b) These models were selected based on results from JmodelTest.

c) Calibrations were used on two nodes for the Phylobayes run : divergence between *H. maculosa* and *E. scolopes* 275mya & divergence between *C. gigas* and *E. scolopes* 500mya

d) Convergence was ascertained using tracecomp from the Phylobayes package

e) Two trees were run using the same alignment, the first was run with RAXML and the resulting tree used to inform Phylobayes, the second was run with IQTREE and included as a supplementary as it does not differ from the previous tree in any significant capacity. We have corrected the typo QITREE in the text.

We have added the details mentioned above to the supplementary materials section "4.1 Multi-gene cephalopod phylogeny and dating".

Original text:

"A total of 2,108 clusters were obtained. Phylogenies were constructed using RAXML31 and Phylobayes32. Divergence times were calculated using Phylobayes, calibrations, setting and model used"



Revised text: (pg. 15-16, lines: 222-232)

"A total of 2,108 clusters were obtained. Phylogenies were constructed using RAxML v8.031 and divergence times estimated by Phylobayes v4.132. RAxML v8.031 was run using the GTR+G+I model ascertained from JmodelTest v2.1.10. using the cAIC criterion for 100 bootstraps. Phylobayes estimated divergence times under a strict clock with a mixture model of F81+G with a burn-in of 10%. Calibrations were used as follows : divergence between *H. maculosa* and *E. scolopes* 275mya & divergence between *C. gigas* and *E. scolopes* 500mya. Two runs were performed and convergence verified using bpcomp, which confirmed a maximum difference of < 0.1 and tracecomp, which also indicated convergence with an effective sample size(EES) of > 200 for all parameters. Both programs used were from the Phylobayes package."

Reviewer #2: Review

Manuscript Number: GIGA-D-20-00135

Title: Adaptive venom evolution and toxicity in octopods is driven by extensive novel gene formation, expansion and loss

submitted to: GigaScience

This manuscript presents interesting data sets of both the genomic sequence of the TTX-bearing octopus *Hapalochlaena maculosa* as well as transcriptomes from twelve different tissues. The methods used were appropriate for the aims of the study including the use of two different methods to prepare (Illumina and Chicago), sequence (Illumina HiSeq 2000 and Dovetail) and assemble the genome (Illumina and HiRise). The authors do a good job reporting the statistical analysis of their assembly and comparing their statistics to two other octopus genomes, *Callistoctopus minor* and *Octopus bimaculoides*. Their methods of transcriptome sequencing, analysis and assembly were appropriate. Finally, their analysis of the completeness of their genome was appropriate and indicate that their genome is well constructed.

Their further analysis of the assembled genome and transcriptome are interesting and appropriate including the examination of the expansion of the zinc finger and cadherin/protocadherin gene families that have previously been identified in octopuses. Their analysis of expression differences in genes expressed in the posterior salivary gland between non-TTX bearing octopuses and the TTX-bearing *H. maculosa* is informative and suggests that the expression of serine protease venoms found in non TTX-bearing octopuses is reduced in *H. maculosa*. Finally, the authors confirm that *H. maculosa* has the same set of amino acid substitutions that are found in the voltage-gated sodium channel NaV1 of *Hapalochlaena lunulata*. In both species, these changes in channel structure are likely to impart TTX resistance and explain the genetic mechanism underlying TTX resistance in the genus.

The authors appear to have met the minimum standard of reporting for the journal. However, the authors have not done an adequate job of reviewing the scientific literature that would contextualize their work and this has led to inaccurate statements in the manuscript. The manuscript requires editing for clarity. I will highlight several of the problem sections below.

1) In the abstract/background the authors state "Cephalopods represent a rich system for investigating the genetic basis underlying organismal novelties. This diverse group of specialised predators have evolved many unique adaptations including proteinaceous venom." Proteinaceous venoms are not unique to cephalopods. Snakes have evolved the use of proteinaceous venoms that function as enzymes including serine proteases that the authors suggest are unique to cephalopods. For an example, see a review in *Toxicon* from 2013 by Solange and Serrano. The authors could strengthen this manuscript by discussing their work in the context of the independent evolution in vertebrates and invertebrate lineages of the use of this enzyme class. The author's interesting report that serine protease expression is reduced in a tetrodotoxin (TTX) bearing cephalopod compared to non-TTX bearing cephalopods is overshadowed by this mischaracterization of the uniqueness of this character in cephalopods.

It was not our intention to convey that cephalopods are the only taxa to have evolved proteinaceous venom and to rectify this we have modified the sentence in the abstract to more accurately represent the literature. Additionally, we clarified the independent evolution between invertebrates and vertebrates in the introduction.

Abstract:

Original text:

"Cephalopods represent a rich system for investigating the genetic basis underlying organismal novelties. This diverse group of specialised predators have evolved many unique adaptations including proteinaceous venom."

Revised text: (pg.1, lines:23-25)

"Cephalopods represent a rich system for investigating the genetic basis underlying organismal novelties. This diverse group of specialized predators has evolved many adaptations including proteinaceous venom."

Background:

Original text:

"Furthermore, proteinaceous venom is produced and stored within a specialised gland in cephalopods known as the posterior salivary gland (PSG)"

Revised text: (pg.3-4, lines:63-71)

"Furthermore, the cephalopods have independently evolved proteinaceous venom, which is produced and stored within a specialised gland in known as the posterior salivary gland (PSG). All octopods are believed to possess a form of proteinaceous venom used to subdue prey<sup>8–10</sup>. Serine proteases are a common component of cephalopod venoms and have been observed in the PSG of squids, cuttlefish and octopods<sup>10–13</sup>. Convergent recruitment of serine proteases has been observed between many vertebrate (Squamata<sup>14–16</sup> and Monotremata<sup>17</sup>) and invertebrate (Hymenoptera<sup>18</sup>, Arachnida<sup>19</sup>, Gastropoda<sup>20</sup>, Remipedia<sup>21</sup> and Cnidarian<sup>22</sup>) venomous lineages."

2) In the abstract/findings description the authors state "...voltage-gated sodium channels in *H. maculosa* contain a resistance mutation found in pufferfish and garter snakes, which is absent in other octopods." *Hapalochlaena maculosa* has the same amino acid sequences encoded in the voltage-gated sodium channel genes NaV1 and NaV2 as previously reported for the Greater Blue-ringed octopus *Hapalochlaena lunulata*, in *Toxicon* from 2019 by Geffeny and colleagues.

This sentence has been corrected to reflect the recent finding of the resistance mutations by Geffeny et al 2019 in *H. lunulata*.

Original sentence:

"Moreover, voltage-gated sodium channels in *H. maculosa* contain a resistance mutation found in pufferfish and garter snakes, which is absent in other octopods"

Modified sentence: (pg.2, lines:38-40)

"Moreover, voltage-gated sodium channels in *H. maculosa* contain a resistance mutation found in pufferfish and garter snakes, which is exclusive to the genus."

3) In the background section of the main body the authors state "How resistance to TTX has been acquired at the genetic level, remains a large unknown, with TTX resistance studied in only in a few select species (i.e. pufferfish<sup>13</sup>, newts<sup>14,15</sup> and gastropods<sup>16</sup>)." The changes in voltage-gated sodium channel genes that lead to TTX-resistance are well understood. Genetic changes that lead to TTX resistance have been examined in groups not included in the authors list including other invertebrates (e.g. insects and blue-ringed octopuses) as well as snakes. The authors statement mischaracterizes the body of literature examining the evolution of TTX resistance.

This section has been modified to more accurately depict the current literature by providing more examples of taxa which exhibit resistance to TTX. We now included an example of an arachnid whose channels have been examined for TTX resistance, however we were unable to find an example of an insect as suggested above by reviewer 2. We would be happy to include an example of an insect if the reference could be provided.

Original text:

"How resistance to TTX has been acquired at the genetic level, remains a large unknown, with TTX resistance studied in only in a few select species (i.e. pufferfish<sup>13</sup>, newts<sup>14,15</sup> and gastropods<sup>16</sup>)."

Revised text: (pg. 4, lines: 74-89)

"The mechanism of TTX resistance, which allows for safe sequestration of TTX, has been attributed to several substitutions in the p-loop regions of voltage-gated sodium channels(Nav) in *H. lunulata*<sup>24</sup>. However, these channels have yet to be examined in *H. maculosa* and *H. fasciata*. TTX resistance has also been studied in a range of other genera including, pufferfish<sup>25</sup>, newts<sup>26,27</sup> arachnids<sup>28</sup>, snakes<sup>29</sup> and gastropods<sup>30</sup>."

4)In the data description the authors discuss their work to identify the expansion of genes in the cadherin/protocadherin gene family. This section requires citations as well as correction of existing citations.

a.The authors state "*H. maculosa* and *C. minor* exhibit expansions in the cadherin gene family, characteristic of other octopod genomes, including *O. bimaculoides* (Fig1b)." without including a reference. This statement requires a reference and the discussion of their data would be improved by comparing their findings to other articles that have examined the expansion of the cadherin gene family and specifically protocadherins, for example Styfhals et al. (2019) in *Frontiers in Physiology*.

We agree with the reviewer that further discussion was required for this section and have restructured the paragraph to the following:

Original text:

"Organismal impact of novel genes and gene family expansions  
Gene family expansions between octopods (*O. bimaculoides*, *C. minor* and *H. maculosa*) and three other molluscan genomes (*Aplysia californica*, *Lottia gigantea* and *Crassostrea gigas*) were examined using Pfam annotations. A total of 5565 Pfam domains were identified among six molluscan genomes. *H. maculosa* and *C. minor* exhibit expansions in the cadherin gene family, characteristic of other octopod genomes, including *O. bimaculoides* (Fig1b). *C. minor*, in particular, shows the greatest expansion of this family within octopods. Expansions of protocadherins, a subset of the cadherin family, have also occurred independently in squid<sup>20</sup>, with the octopod expansions occurring post divergence ~135 mya<sup>20</sup>. Cadherins, specifically protocadherins, are essential mediators of short-range neuronal connections in mammals<sup>42-43</sup>. Due to the absence of a myelin sheath in octopods, short-range connections are integral to maintaining signal fidelity over distance<sup>44</sup>."

Revised text: (pg. 10-12, lines: 183-206)

"Organismal impact of novel genes and gene family expansions  
Gene family expansions between octopods (*O. bimaculoides*, *C. minor* and *H. maculosa*) and three other molluscan genomes (*Aplysia californica*, *Lottia gigantea* and *Crassostrea gigas*) were examined using Pfam annotations. A total of 5565 Pfam domains were identified among six molluscan genomes. *H. maculosa* and *C. minor* exhibit expansions in the cadherin gene family, characteristic of other octopod genomes, including *O. bimaculoides* (Fig1b)<sup>42,64</sup>. *C. minor*, in particular, shows the greatest expansion of this family within octopods. Expansions of protocadherins, a subset of the cadherin family, have also occurred independently in squid<sup>42</sup>, with the octopod expansions occurring post divergence ~135 mya<sup>42</sup>. The shared ancestry of octopod cadherins was also documented by Styfhals et al<sup>64</sup> using phylogenetic inference between *O. bimaculoides* and *O. vulgaris*. Cadherins, specifically protocadherins, play crucial roles in synapse formation, elimination and axon targeting within mammals and are essential mediators of short-range neuronal connections<sup>65–68</sup>. It should be noted that octopods lack a myelin sheath, as a result short-range connections are integral to maintaining signal fidelity over distance<sup>66</sup>. The independent expansions of protocadherins within chordate and cephalopod lineages are believed to be associated with increased neuronal complexity<sup>42,64</sup>. Elevated expression of protocadherins within neural tissues have been observed in *O. vulgaris* and *O. bimaculoides* by both Styfhals et al<sup>64</sup> and Albertin et al<sup>42</sup> respectively. In particular Styfhals et al<sup>64</sup> noted differential expression across neural tissues including supra-esophageal mass, sub-esophageal mass, optic lobe and the stellate ganglion<sup>64</sup>.

However, functional implications of observed expression patterns remain speculative without further study.”

b.The next sentence ("Expansions of protocadherins, a subset of the cadherin family, have also occurred independently in squid 20, with the octopod expansions occurring post divergence ~135 mya 20.") incorrectly references Williams et al. (2012, reference 20) but should reference Albertin et al. (2015, reference 29).

This reference was corrected as suggested: (pg. 11, line:190-192)

“Expansions of protocadherins, a subset of the cadherin family, have also occurred independently in squid<sup>42</sup>, with the octopod expansions occurring post divergence ~135 mya<sup>42</sup>”

c.The authors state "Cadherins, specifically protocadherins, are essential mediators of short-range neuronal connections in mammals<sup>42 43</sup>. Due to the absence of a myelin sheath in octopods, short-range connections are integral to maintaining signal fidelity over distance<sup>44</sup>." None of the citations in these two sentences are correct and no correct references can be found in the list of citations. These final statements should include the fact that expansion in the number of protocadherin genes also occurs in chordates (for example, Hulpiau & van Roy, 2010 from Molecular Biology and Evolution). There is good evidence that protocadherins have roles in multiple aspects of proper synapse formation in mammals including synapse generation, synapse elimination and axon targeting (for example see reviews by de Wit and Ghosh from 2016 in Nature Reviews Neuroscience as well as Peek et al. from 2017 in Cellular and Molecular Life Sciences). Though synapses are "short-range connections", proper synapse formation is important for vertebrates and invertebrates with complex nervous systems whether or not that have myelinated axons. The expansion of protocadherin genes in both cephalopods and chordates independently is thought to be linked to increased neuronal circuit complexity.

We have corrected the miscitations and restructured the paragraph to incorporate the reviewers suggestions and more accurately describe the evolution and role of protocadherins in vertebrates and invertebrates.

Original text:

“Cadherins, specifically protocadherins, are essential mediators of short-range neuronal connections in mammals<sup>42 43</sup>. Due to the absence of a myelin sheath in octopods, short-range connections are integral to maintaining signal fidelity over distance<sup>44</sup>.”

Revised text: (pg. 11-12, lines: 194-206)

“Cadherins, specifically protocadherins, play crucial roles in synapse formation, elimination and axon targeting within mammals and are essential mediators of short-range neuronal connections<sup>65–68</sup>. It should be noted that octopods lack a myelin sheath, as a result short-range connections are integral to maintaining signal fidelity over distance<sup>6</sup>. The independent expansions of protocadherins within chordate and cephalopod lineages are believed to be associated with increased neuronal complexity<sup>42,64</sup>. Elevated expression of protocadherins within neural tissues have been observed in *O. vulgaris* and *O. bimaculoides* by both Styfhals et al<sup>64</sup> and Albertin et al<sup>42</sup> respectively. In particular Styfhals et al<sup>64</sup> noted differential expression across neural tissues including supra-esophageal mass, sub-esophageal mass, optic lobe and the stellate ganglion<sup>64</sup>. However, functional implications of observed expression patterns remain speculative without further study.”

5)In the data description the authors discuss their work to identify the expansion of genes in the zinc finger gene family. The author state "*H. maculosa* also shows expansions in the C2H2-type zinc finger family. Zinc fingers form an ancient family of transcription factors, which among other roles serve to regulate transposon splicing, embryonic and neural development 45,46." These references are not correct for this statement. The manuscript would be strengthened by proper citations in this section, for example Fedotova and colleagues (2017) have a review in *Acta Naturae*. Additionally, there is evidence that these proteins have roles in both transposon suppression and alternative splicing.

Citations were corrected as suggested: (pg. 12, lines: 207-209)

"H. maculosa also shows expansions in the C2H2-type zinc finger family. Zinc fingers form an ancient family of transcription factors, which among other roles serve to regulate transposon splicing as well as embryonic and neural development<sup>69,70</sup>."

6)The authors state "It has been hypothesized that the Hapalochlaena PSG will exhibit a loss of redundant proteinaceous toxins due to the presence of TTX." This sentence should have a citation or the authors should explain that this statement is their hypothesis.

This statement is a hypothesis by the authors and the sentence has been modified to reflect this.

Original sentence:

"It has been hypothesized that the Hapalochlaena PSG will exhibit a loss of redundant proteinaceous toxins due to the presence of TTX."

Revised sentence: (pg.17, lines: 299-300)

"We hypothesize that the Hapalochlaena PSG will exhibit a loss of redundant proteinaceous toxins due to the presence of TTX."

7)There are minor errors in the sequences presented in Figure 5. In multiple invertebrate species, phenylalanine (F) replaces tyrosine (Y) in the D1 pore. In pufferfish cysteine (C) replaces tyrosine (Y). The figure is constructed in a way that suggests that these amino acids replace a neighboring aspartic acid (D).

Figure 5 has been modified so all sequences align correctly.

Low quality version shown here. The corrected version has been uploaded to replace the original

Reviewer #3

A truly excellent paper that was a pleasure to read. My comments are very minor:

- TTX resistance in *Thamnophis* species of snakes should be referenced in the sentence "How resistance to TTX has been acquired at the genetic level, remains a large unknown, with TTX resistance studied in only in a few select species (i.e. pufferfish<sup>13</sup>, newts<sup>14,15</sup> and gastropods<sup>16</sup>)". This is cited later (ref 58) but it would be appropriate for inclusion in this sentence too.

This citation has been added as suggested to a modified version of this sentence as suggested by reviewer 1:

Original text:

"How resistance to TTX has been acquired at the genetic level, remains a large unknown, with TTX resistance studied in only in a few select species (i.e. pufferfish<sup>13</sup>, newts<sup>14,15</sup> and gastropods<sup>16</sup>)"

Revised text: (pg. 4, lines: 74-79)

"The mechanism of TTX resistance, which allows for safe sequestration of TTX, has been attributed to several substitutions in the p-loop regions of voltage-gated sodium channels(Nav) in *H. lunulata*<sup>13</sup>. However, these channels have yet to be examined in *H. maculosa* and *H. fasciata*. TTX resistance has also been studied in a range of other genera including, pufferfish<sup>14</sup>, newts<sup>15,16</sup> arachnids<sup>17</sup>, snakes<sup>18</sup> and gastropods<sup>19</sup>.

- For the PSG specific genes, calculations of the relative rates of evolution would be informative as this would be suggestive of adaptive evolution eg are the abundant serine proteases *C. minor* showing signs of accelerated evolution seen in other venomous lineages such as snakes? Previous work has shown that the sites on the molecular surface are undergoing episodic diversification when compared across a wide range of lineages. In this case, it would be interesting to see what the evolutionary patterns are for *C. minor*, in that is the extensive duplication accompanied by signs of diversification?

We investigated the potential of positive selection within serine proteases with a focus



on genes specifically expressed in the posterior salivary gland (venom gland). Unfortunately, we did not find strong evidence of accelerated evolution in these genes with the method described below. In the future we look forward to conducting a more in-depth analysis of this interesting family with a more comprehensive sampling across coleoid cephalopods.

This section below, describing our additional analyses, has been added to the supplementary materials: (pg. 24-25, lines: 355-382)

6.4 Examination of selection and evolutionary rates in octopod serine proteases  
Gene models (aa) from the three octopod genomes (*H. maculosa*, *O. bimaculoides* and *C. minor*) were annotated with Interproscan and serine proteases with the Pfam PF00089 extracted for examination. Gene models and their corresponding CDS sequences were imported into Geneious v10.2.6 and selected for a single trypsin (PF00089) domain greater than 200aa/600bp long. The region containing the trypsin domain was then extracted from the nucleic acid sequences and MAFFT v7.407 was used to align sequences using Translation align in Geneious v10.2.6, which interpreted the first codon as the start of the codon region and used the first translation frame. The resulting alignment was tested for an appropriate substitution model in jModelTest v2.2.10 and a tree was generated with RAxML v8.0 using the GTR +G+I model and 100 bootstraps. The resulting tree and alignment were examined using codeml via EasyCodeml v1.21 from the PAML package to examine non-synonymous to synonymous substitution rates for evidence of positive selection. We first used a site-based model which allows for  $\omega$  values to vary between sites along the protein. Comparison of the nested models (M1a-M2a) and (M7-M8) did not reveal any sites under positive selection ( $p > 0.05$ ). In order to access the potential for different rates of evolution within specific lineages we used a branch site model which allows for  $\omega$  values to vary between sites and branches. For the foreground a large clade of genes, majority of which were specifically expressed in the posterior salivary gland (PSG) was selected and compared to all other non-PSG specific genes. No sites among the foreground branches were significantly accelerated relative to the background. The last method implemented is similar to the branch site model, however, the rate along sites is constant and the rate between the background and foreground can differ. This also found no evidence of positive selection between the background and foreground lineages. It should be noted that serine proteases are a large and complex family and are due a more in-depth analysis in coleoid cephalopods, which could form a complete stand-alone study.

- The M12B metalloprotease type in snake venom has a wide range of demonstrated activities, both anticoagulant (fibrinogenolytic) but also procoagulant (Factor X activating [Atractaspis and Daboia venoms] and prothrombin activating (Bothrops, Echis, and Dispholidus/Thelotornis venoms)) prothrombin activating metalloproteases from Dispholidus typus (boomslang) and Thelotornis mossambicanus (twig snake).  
" Comp Biochem Physiol C Toxicol Pharmacol: 108625. Oulion, B., J. S. Dobson, C. N. Zdenek, K. Arbuckle, C. Lister, F. C. P. Coimbra, B. Op den Brouw, J. Debono, A. Rogalski, A. Violette, R. Fourmy, N. Frank and B. G. Fry (2018). "Factor X activating Atractaspis snake venoms and the relative coagulotoxicity neutralising efficacy of African antivenoms." Toxicol Lett 288: 119-128.  
Rogalski, A., C. Soerensen, B. Op den Brouw, C. Lister, D. Dashevsky, K. Arbuckle, A. Gloria, C. N. Zdenek, N. R. Casewell, J. M. Gutierrez, W. Wuster, S. A. Ali, P. Masci, P. Rowley, N. Frank and B. G. Fry (2017). "Differential procoagulant effects of saw-scaled viper (Serpentes: Viperidae: Echis) snake venoms on human plasma and the narrow taxonomic ranges of antivenom efficacies." Toxicol Lett 280: 159-170.  
Sousa, L. F., C. N. Zdenek, J. S. Dobson, B. Op den Brouw, F. Coimbra, A. Gillett, T. H. M. Del-Rei, H. M. Chalkidis, S. Sant'Anna, M. M. Teixeira-da-Rocha, K. Grego, S. R. Travaglia Cardoso, A. M. Moura da Silva and B. G. Fry (2018). "Coagulotoxicity of Bothrops (Lancehead Pit-Vipers) Venoms from Brazil: Differential Biochemistry and Antivenom Efficacy Resulting from Prey-Driven Venom Variation." Toxins (Basel) 10(10): 411.

We agree that these references should be included in the manuscript and have added them as appropriate. (pg. 18, lines:316-319)

"Similarly, reprotolysin (M12B) exhibits shifting expression in *H. maculosa*, presumably from the PSG to the branchial heart, and a complete loss of paralogs from the genome. While the function of this protein has not been assessed in octopus, members of this protein family exhibit anticoagulant properties in snake venom75–78.

#### Additional Information:

| Question                                                                                                                                                                                                                                                                                                                                                                                                                                                                                                                            | Response   |
|-------------------------------------------------------------------------------------------------------------------------------------------------------------------------------------------------------------------------------------------------------------------------------------------------------------------------------------------------------------------------------------------------------------------------------------------------------------------------------------------------------------------------------------|------------|
| <p>Are you submitting this manuscript to a special series or article collection?</p>                                                                                                                                                                                                                                                                                                                                                                                                                                                | <p>No</p>  |
| <p><b>Experimental design and statistics</b></p> <p>Full details of the experimental design and statistical methods used should be given in the Methods section, as detailed in our <a href="#">Minimum Standards Reporting Checklist</a>. Information essential to interpreting the data presented should be made available in the figure legends.</p> <p>Have you included all the information requested in your manuscript?</p>                                                                                                  | <p>Yes</p> |
| <p><b>Resources</b></p> <p>A description of all resources used, including antibodies, cell lines, animals and software tools, with enough information to allow them to be uniquely identified, should be included in the Methods section. Authors are strongly encouraged to cite <a href="#">Research Resource Identifiers</a> (RRIDs) for antibodies, model organisms and tools, where possible.</p> <p>Have you included the information requested as detailed in our <a href="#">Minimum Standards Reporting Checklist</a>?</p> | <p>Yes</p> |
| <p><b>Availability of data and materials</b></p> <p>All datasets and code on which the conclusions of the paper rely must be either included in your submission or deposited in <a href="#">publicly available repositories</a> (where available and ethically appropriate), referencing such data using a unique identifier in the references and in the “Availability of Data and Materials” section of your manuscript.</p>                                                                                                      | <p>Yes</p> |



Have you have met the above requirement as detailed in our [Minimum Standards Reporting Checklist?](#)

1 **Adaptive venom evolution and toxicity in octopods is driven by**  
2 **extensive novel gene formation, expansion and loss**

3 Brooke L. Whitelaw<sup>1,2</sup>, Ira R. Cooke<sup>3,4</sup>, Julian Finn<sup>2</sup>, Rute R. da Fonseca<sup>5</sup>, Elena A.

4 Ritschard<sup>6</sup>, M. T P. Gilbert<sup>7</sup> Oleg Simakov<sup>6</sup>, Jan M. Strugnell<sup>1,8</sup>

5

6 <sup>1</sup>Centre for Sustainable Tropical Fisheries and Aquaculture, James Cook University,

7 Townsville, Queensland, 4811, Australia

8 <sup>2</sup>Sciences, Museum Victoria, Carlton, Victoria 3053, Australia

9 <sup>3</sup>College of Public Health, Medical and Vet Sciences, James Cook University,

10 Townsville, Queensland, 4811, Australia

11 <sup>4</sup>La Trobe Institute of Molecular Science, La Trobe University, Melbourne, Victoria

12 3086, Australia

13 <sup>5</sup>Center for Macroecology, Evolution and Climate (CMEC), GLOBE Institute, University

14 of Copenhagen, Universitetsparken 15, 2100 Copenhagen, Denmark;

15 <sup>6</sup>Department of Molecular Evolution and Development, University of Vienna,

16 Universitätsring 1, 1010 Wien, Austria

17 <sup>7</sup>Center for Evolutionary Hologenomics, GLOBE Institute, University of Copenhagen,  
18 Øster Voldgade 5-7, 1350 Copenhagen, Denmark;

19 <sup>8</sup>Department of Ecology, Environment and Evolution, La Trobe University, Melbourne,  
20 Victoria, 3086 Australia

## 21 ***Abstract***

### 22 ***Background***

23 Cephalopods represent a rich system for investigating the genetic basis underlying  
24 organismal novelties. This diverse group of specialized predators has evolved many  
25 adaptations including proteinaceous venom. Of particular interest is the blue-ringed-  
26 octopus genus (*Hapalochlaena*), which are the only octopods known to store large  
27 quantities of the potent neurotoxin, tetrodotoxin, within their tissues and venom gland.

### 28 ***Findings***

29 To reveal genomic correlates of organismal novelties, we conducted a comparative  
30 study of three octopod genomes, including the Southern blue-ringed octopus  
31 (*Hapalochlaena maculosa*). We present the genome of this species and reveal highly  
32 dynamic evolutionary patterns at both non-coding and coding organizational levels.

33 Gene family expansions previously reported in *Octopus bimaculoides* (e.g., zinc finger  
34 and cadherins, both associated with neural functions), as well as formation of novel  
35 gene families, dominate the genomic landscape in all octopods. Examination of tissue-  
36 specific genes in the posterior salivary gland (PSG) revealed that expression was  
37 dominated by serine proteases in non- tetrodotoxin bearing octopods, while this family  
38 was a minor component in *H. maculosa*. Moreover, voltage-gated sodium channels in *H.*  
39 *maculosa* contain a resistance mutation found in pufferfish and garter snakes, which is  
40 exclusive to the genus. Analysis of the PSG microbiome revealed a diverse array of  
41 bacterial species, including genera that can produce tetrodotoxin, suggestive of a  
42 possible production source.

### 43 **Conclusions**

44 We present the first tetrodotoxin-bearing octopod genome *H. maculosa*, which displays  
45 lineage-specific adaptations to tetrodotoxin acquisition. This genome, along with other  
46 recently published cephalopod genomes, represents a valuable resource from which  
47 future work could advance our understanding of the evolution of genomic novelty in  
48 this family.

49

## 50 ***Background***

51 Reconstructing the evolution of novelties at the genomic level is becoming an  
52 increasingly viable approach to understand their origin. The recent publication of  
53 octopod genomes provides an opportunity to investigate the link between genomic and  
54 organismal evolution in this unique lineage for which genomic resources have been  
55 lacking<sup>1</sup>. From their emergence 275 mya<sup>2</sup>, octopods have diversified into > 300  
56 species, inhabiting tropical to polar regions, from the deep sea to shallow intertidal  
57 zones<sup>3</sup>. As a highly diverse group, octopods show remarkable variation in body form  
58 and function. They are specialised soft-bodied predators that are well adapted to their  
59 environment with prehensile limbs lined with chemosensory suckers<sup>4</sup>, the ability to  
60 manipulate skin texture and colour using specialised chromatophores<sup>5</sup>, the largest  
61 invertebrate nervous systems (excluding those of other cephalopods)<sup>6</sup>, and a relatively  
62 large circumesophageal brain allowing for complex problem solving and retention of  
63 information<sup>7</sup>. Furthermore, the cephalopods have independently evolved proteinaceous  
64 venom, which is produced and stored within a specialised gland in known as the  
65 posterior salivary gland (PSG). All octopods are believed to possess a form of

66 proteinaceous venom used to subdue prey<sup>8-10</sup>. Serine proteases are a common  
67 component of cephalopod venoms and have been observed in the PSG of squids,  
68 cuttlefish and octopods<sup>10-13</sup>. Convergent recruitment of serine proteases has been  
69 observed between many vertebrate (Squamata<sup>14-16</sup> and Monotremata<sup>17</sup>) and  
70 invertebrate (Hymenoptera<sup>18</sup>, Arachnida<sup>19</sup>, Gastropoda<sup>20</sup>, Remipedia<sup>21</sup> and Cnidarian<sup>22</sup>)  
71 venomous lineages.

72 In addition to these proteinaceous venoms, the blue-ringed octopus (genus  
73 *Hapalochlaena*) is the only group that also contains the potent non-proteinaceous  
74 neurotoxin, tetrodotoxin (TTX)<sup>12,23</sup>. The mechanism of TTX resistance, which allows for  
75 safe sequestration of TTX, has been attributed to several substitutions in the p-loop  
76 regions of voltage-gated sodium channels(Na<sub>v</sub>) in *H. lunulata*<sup>24</sup>. However, these  
77 channels have yet to be examined in *H. maculosa* and *H. fasciata*. TTX resistance has  
78 also been studied in a range of other genera including, pufferfish<sup>25</sup>, newts<sup>26,27</sup>  
79 arachnids<sup>28</sup>, snakes<sup>29</sup> and gastropods<sup>30</sup>.

80 The blue-ringed octopus is easily identified by iridescent blue rings, which  
81 advertise its toxicity in an aposematic display<sup>31-33</sup>. Sequestration of the TTX within  
82 bodily tissues is unique to this genus among cephalopods<sup>32,34</sup>. While other unrelated

83 TTX-bearing species primarily use TTX for defense, *Hapalochlaena* is the only known  
84 taxa to utilise TTX in venom<sup>23,35</sup>. The impact of TTX inclusion on venom composition  
85 and function has been previously investigated in the southern blue-ringed octopus (*H.*  
86 *maculosa*)<sup>9</sup>. Relative to the non-TTX bearing species *Octopus kaurna*, *H. maculosa*  
87 exhibited greater expression of putative dispersal factors such as hyaluronidase, which  
88 serve to aid in the dispersal of toxic venom components<sup>9</sup>. Conversely, tachykinin-  
89 neurotoxins known from other octopods<sup>36,37</sup> were absent from the *H. maculosa* PSG<sup>9</sup>.  
90 Further investigation into the broader impact of TTX on the evolutionary trajectory of  
91 the species has yet to be addressed due to the absence of a genome.

92         This study presents the genome of the southern blue-ringed octopus (*H.*  
93 *maculosa*), the first from the genus *Hapalochlaena*. By using a comparative genomic  
94 approach we are able to examine the emergence of octopod novelties, at a molecular  
95 level between *H. maculosa* and the two non-TTX bearing octopods: the California two-  
96 spot octopus (*O. bimaculoides*) and the long-armed octopus (*Callistoctopus minor*). We  
97 also address unique features of venom evolution in octopods while also addressing the  
98 species-specific evolution of tetrodotoxin acquisition and resistance in *H. maculosa*.

99



100 *Keywords:* cephalopod genome, comparative genomics, gene family expansions,  
101 transposable elements, venom evolution

102

103

## 104 ***Data Description***

### 105 ***Genome assembly and annotation***

106       The southern blue-ringed octopus genome was sequenced using Illumina paired  
107 end and Dovetail sequencing from a single female collected at Beaumaris Sea Scout  
108 Boat Shed, Beaumaris, Port Phillip Bay, Victoria, Australia. The assembly was  
109 composed of 48,285 scaffolds with an N50 of 0.93 Mb and total size of 4.08 GB. A total  
110 of 29,328 inferred protein coding genes were predicted using a PASA<sup>38</sup> and an  
111 Augustus<sup>39</sup> pipeline and supplemented with zinc finger and cadherin genes obtained  
112 from aligning *H. maculosa* transcripts to *O. bimaculoides* gene models(Supplementary  
113 notes 1.1-1.4). Completeness of the genome was estimated using BUSCO<sup>40</sup>, which  
114 identified 87.7% complete and 7.5% fragmented genes against the metazoan database  
115 of 978 groups (Supplementary notes 3.2).

116 *H. maculosa* has a highly heterozygous genome (0.95%), similar to *O. vulgaris*  
117 (1.1%)<sup>41</sup> but far higher than *O. bimaculoides* (0.08%)<sup>42</sup>. While the low heterozygosity of  
118 *O. bimaculoides* is surprising, other molluscs also have highly heterozygous genomes in  
119 accordance with *H. maculosa*, including the gastropods (1-3.66%)<sup>43,44</sup> and bivalves  
120 (0.51-3%)<sup>45-51</sup>(Supplementary table 5).

121

## 122 ***PSMC (Pairwise Sequentially Markovian Coalescent) and mutation rate***

123 The mutation rate for *H. maculosa* was estimated to be  $2.4 \times 10^{-9}$  per site per  
124 generation based on analysis of synonymous differences with *O. bimaculoides*  
125 (Supplementary note 1.5). The mutation rate is comparable to the average mammalian  
126 mutation rate of  $2.2 \times 10^{-9}$  per site per generation, and *Drosophila*,  $2.8 \times 10^{-9}$ <sup>52,53</sup>. Due to  
127 the unavailability of a suitable closely related and comprehensive genome until the  
128 publication of *O. bimaculoides* in 2015<sup>42</sup>, this is the first genome-wide mutation rate  
129 estimated for any cephalopod genome.

130 The historic effective population size ( $N_e$ ) of *H. maculosa* was estimated using  
131 the pairwise sequentially Markovian coalescent (PSMC) model (Supplementary Fig 2).  
132 Population size was found to initially increase during the early Pleistocene, followed by

133 a steady decline which slows slightly around 100kya. Note that PSMC estimates are not  
134 reliable at very recent times due to a scarcity of genomic blocks that share a recent  
135 common ancestor in this highly heterozygous genome. A decline in population size  
136 started during the mid-Pleistocene approximately 1mya, a time of unstable  
137 environmental conditions with fluctuations in both temperature and glaciation events<sup>54-</sup>  
138 <sup>56</sup>. Corals in the genus *Acropora* show a similar pattern of expansion and contraction  
139 attributed to niche availability post mass extinction of shallow-water marine organisms  
140 2-3 mya, followed by the unstable mid-Pleistocene climate<sup>57,58</sup>. A similar pattern of  
141 expansion and decline in effective population size has also been observed in the  
142 Antarctic ice fish among other marine organisms distributed in the Southern  
143 Hemisphere<sup>59</sup>.

144

### 145 ***Phylogenomics***

146 A total of 2,108 (single copy/ 1-to-1) orthologous clusters were identified  
147 between the molluscan genomes and transcriptomes of 11 species and used to construct  
148 a time-calibrated maximum likelihood tree(Fig 1a). The phylogenetic reconstruction  
149 estimated the divergence time between *H. maculosa* and its nearest relative, *O.*

150 *bimaculoides*, to be ~59 mya. *C. minor* diverged from this clade much earlier ~183  
151 mya. Previous phylogenies using a combination of a small number of mitochondrial  
152 and nuclear genes<sup>60-62</sup> and orthologs derived from transcriptomes<sup>63</sup> support this  
153 topology. Likewise, estimates by Tanner et al.<sup>2</sup>, using a concatenated alignment of 197  
154 genes with a Bayesian approach, placed divergence of *H. maculosa* from *Abdopus*  
155 *aculeatus* at ~59 mya<sup>2</sup>.

156         Inference of “shared” phenotypic traits can be difficult to resolve with the  
157 current literature. For example, false eye spots/ocelli observed in both *O. bimaculoides*  
158 and *H. maculosa* are structurally very different. Each ocellus in *H. maculosa* is composed  
159 of a continuous single blue ring<sup>33</sup>, while *O. bimaculoides* has a blue ring composed of  
160 multiple small rings. Morphological variations of ocelli structure and colour, in  
161 conjunction with the taxonomically sporadic occurrence of this trait across species  
162 within *Octopus* and *Amphioctopus*, limits our interpretation as to the evolutionary  
163 history of this trait in octopods<sup>3</sup>. Large gaps remain in the literature between  
164 phenotypic traits in cephalopods and their genomic source<sup>1</sup>. This study aims to provide  
165 a genomic framework to enable resolution of these features by profiling changes in

166 several genomic characters: (i) gene duplications, (ii) novel gene formation, and (iii)  
167 non-coding element evolution.

168

169 **Fig 1. Comparisons of molluscan genomes and gene families** a) Time-calibrated maximum likelihood  
170 phylogeny of seven molluscan genomes (*Aplysia californica*, *Lottia gigantea*, *Crassostrea gigas*, *Euprymna*  
171 *scolopes*, *Octopus bimaculoides*, *Callistoctopus minor* and *Hapalochlaena maculosa*) and four transcriptomes  
172 (*Octopus kaurna*, *Octopus vulgaris*, *Sepia officinalis* and *Idiosepius notoides*) using 2,108 single copy  
173 orthologous sequence clusters. Node labels show divergence times in millions of years (mya), blue  
174 (divergence to octopods) and orange bars (decapods) represent standard error within a 95% confidence  
175 interval. Octopodiformes lineages are highlighted in blue and decapod orange. Scale bar represents  
176 millions of year (mya). b) Expansions of octopod gene families relative to molluscan genomes *Aplysia*  
177 *californica* (A. cali), *Biomphalaria glabrata* (B. glab), *Crassostrea gigas* (C. gig), *Lottia gigantea* (L. gig),  
178 *Euprymna scolopes* (E. scol) c) Lineage-specific gene expansions in the octopod genomes *Callistoctopus*  
179 *minor* (C. min), *Octopus bimaculoides* (O. bim) and *Hapalochlaena maculosa* (H. mac). Domains  
180 abbreviated: Chondroitin N-acetylgalactosaminyltransferase (CHGN), C2H2(Cys2-His2) zinc finger and  
181 Cornifin SPRR(small proline-rich proteins).

182

183 ***Organismal impact of novel genes and gene family expansions***

184 Gene family expansions between octopods (*O. bimaculoides*, *C. minor* and *H.*  
185 *maculosa*) and three other molluscan genomes (*Aplysia californica*, *Lottia gigantea* and  
186 *Crassostrea gigas*) were examined using Pfam annotations. A total of 5565 Pfam  
187 domains were identified among six molluscan genomes. *H. maculosa* and *C. minor*  
188 exhibit expansions in the cadherin gene family, characteristic of other octopod  
189 genomes, including *O. bimaculoides* (Fig1b)<sup>42,64</sup>. *C. minor*, in particular, shows the  
190 greatest expansion of this family within octopods. Expansions of protocadherins, a  
191 subset of the cadherin family, have also occurred independently in squid<sup>42</sup>, with the  
192 octopod expansions occurring post divergence ~135 mya<sup>42</sup>. The shared ancestry of  
193 octopod cadherins was also documented by Styfhals et al<sup>64</sup> using phylogenetic  
194 inference between *O. bimaculoides* and *O. vulgaris*. Cadherins, specifically  
195 protocadherins, play crucial roles in synapse formation, elimination and axon targeting  
196 within mammals and are essential mediators of short-range neuronal connections<sup>65-68</sup>. It  
197 should be noted that octopods lack a myelin sheath, as a result short-range connections  
198 are integral to maintaining signal fidelity over distance<sup>6</sup>. The independent expansions  
199 of protocadherins within chordate and cephalopod lineages are believed to be  
200 associated with increased neuronal complexity<sup>42,64</sup>. Elevated expression of

201 protocadherins within neural tissues have been observed in *O. vulgaris* and *O.*  
202 *bimaculoides* by both Styfhals et al<sup>64</sup> and Albertin et al<sup>42</sup> respectively. In particular  
203 Styfhals et al<sup>64</sup> noted differential expression across neural tissues including supra-  
204 esophageal mass, sub-esophageal mass, optic lobe and the stellate ganglion<sup>64</sup>. However,  
205 functional implications of observed expression patterns remain speculative without  
206 further study.

207 *H. maculosa* also shows expansions in the C2H2-type zinc finger family. Zinc  
208 fingers form an ancient family of transcription factors, which among other roles serve  
209 to regulate transposon splicing as well as embryonic and neural development<sup>69,70</sup>.  
210 Expansion of this type of zinc finger in *O. bimaculoides* has been associated with neural  
211 tissues. It should be noted that due to the inherent difficulty in fully annotating the  
212 zinc finger family, alternative methods were used to examine the number of exons in *C.*  
213 *minor* with high similarity to annotated zinc finger genes in *O. bimaculoides*  
214 (Supplementary notes 5.1). A total of 609 exons (not captured by published gene  
215 models) from *C. minor* were found with high similarity to accepted zinc finger genes in  
216 *O. bimaculoides*, suggesting this family is larger than that which the genome annotation  
217 infers.



218 Examination of genes specifically expressed within neural tissues found that  
219 cadherins were among the most highly expressed gene families of all octopod species.  
220 Particularly in *C. minor*, relative to the other octopods, such a trend reflects the gene  
221 family expansions found in this species (Fig2c). Zinc fingers were less pronounced,  
222 representing 1.1% of overall expression in *C. minor* compared to cadherins at 11.3%.  
223 Overall, neural tissues express a large diversity of Pfams with each species, exhibiting a  
224 similar profile and proportion of orthologous to lineage-specific genes.

225

### 226 ***Novel patterns of gene expression***

227 High-level examination of gene dynamics (expression, loss of expression and  
228 absence of expression) between octopods across different levels of orthology provides  
229 insight into large-scale expression patterns and highlights lineage-specific loss of  
230 expression.

231 The greatest proportion of genes in each species examined were not specific to  
232 octopods or an octopus lineage (ancient genes) (Fig 2a). Expression of these genes were  
233 enriched in neural tissues across all species, indicating the core conservation of neural  
234 development and function. However, we also find that genes specific to each octopod

235 species also show this expression pattern. The overall elevated expression of genes  
236 within neural tissues could be reflective of the extensive neural network present in  
237 cephalopods, which comprises around 520 million nerve cells<sup>71</sup>, rivalling  
238 vertebrates/mammals in size<sup>6</sup>. Expression of many novel genes in the nervous system  
239 may also indicate contribution of those genes to lineage-specific neural network  
240 evolution. In contrast, genes that date back to the shared octopod ancestor show  
241 highest expression in male reproductive tissues in all species.

242 Loss of expression between octopod genomes is exhibited most clearly in *H. maculosa*  
243 with 11% (1993 genes) of all ancient genes having no expression, compared to 1% in  
244 both *O. bimaculoides* and *C. minor*. Absence of gene expression for genes whose  
245 orthologs have retained expression in one or more other species suggests a unique  
246 evolutionary trajectory from other octopods. It should be noted that differences in  
247 tissue sampling may in part influence these values and due to the limited sampling of  
248 species, loss of expression cannot be inferred at a species level and may have occurred  
249 at any point in the lineage. In order to fully understand the implications of the gene  
250 family contractions and loss of expression in *H. maculosa*, relative to other octopods,  
251 further investigation is required.

252

253 **Fig2. Dynamics of gene expression in octopod genomes.** Proportion of gene expression across levels  
254 of specificity from not specific to octopods or an octopus species (left) to octopod-specific (middle) and  
255 lineage-specific (right). Donut plots show gene expression as some expression in any tissue (purple), no  
256 expression (blue) or expression that has been lost (dark blue). Loss of expression requires an ortholog of  
257 the gene to be expressed in one or more species and not expressed in the other species. Heatmaps at each  
258 specificity level show average expression of genes within their respective tissues, low expression (cream)  
259 to high expression (dark red).

260

261 **Fig3. Dynamics of gene expression in neural and venom producing tissues of octopods.** a) Tissue  
262 specific expression of genes within the brain of *H. maculosa*, *O. bimaculoides* and *C. minor* (red). Venn  
263 diagram shows numbers of shared and exclusive genes between species (Left). Bar chart of the top 5  
264 Pfams and their contribution to overall expression in the brain (right). b) Tissue specific expression of  
265 genes within the posterior salivary gland (PSG) of *H. maculosa*, *O. bimaculoides* and *C. minor* (Blue). Venn  
266 diagram shows numbers of shared and exclusive genes between species (left). Bar chart of the top 5  
267 Pfams and their contribution to overall expression in the PSG (right).

268

269 ***Evolution of the octopod non-coding genome***

270 Similar to other cephalopod genomes, the *H. maculosa* genome has a high repeat  
271 content of 37.09% (bases masked). *O. bimaculoides* and *C. minor* are also highly  
272 repetitive with 46.39% and 44% of their genomes composed of transposable elements  
273 (TE) respectively. Of the repetitive elements, LINEs dominate the decapodiform  
274 *Euprymna scolopes* genome accounting for its larger genome size<sup>72</sup>, while SINEs are  
275 expanded in all four octopod genomes. SINEs have been previously documented in *O.*  
276 *bimaculoides* (7.86%)<sup>42</sup>, comparable with *H. maculosa* (7.53%), while fewer SINEs were  
277 previously reported for *C. minor* (4.7%)<sup>73</sup>. SINE elements also dominate the *O. vulgaris*  
278 genome with an expansion occurring post divergence from *O. bimaculoides*<sup>41</sup>. Rolling  
279 circle (RC) elements are a prominent minor component in octopods, particularly in *H.*  
280 *maculosa*. RC transposons have been isolated from plant (*Zea mays*) and mammalian  
281 genomes. They depend greatly on proteins used in host DNA replication and are the  
282 only known class of eukaryotic mobile element (transposon) to have this dependence<sup>74</sup>.  
283 TE elements in cephalopod lineages show differing expansions between most of the  
284 genomes currently available, suggesting they are highly active and play a strong role in  
285 cephalopod evolution.

286           Enrichment of transposable elements associated with genes (flanking regions  
287 10kb up- and downstream) was not observed compared to the whole genome for any  
288 species examined. More notable were differences between species, in particular *C.*  
289 *minor* shows a greater proportion of LINE to SINE elements relative to both *O.*  
290 *bimaculoides* and *H. maculosa*.

291           Together, this highlights a very dynamic evolutionary composition of repeats in  
292 cephalopods, that requires further study to test for any potential association with  
293 changes in gene expression or genome evolution.

294

### 295 ***Dynamics of gene expression in the posterior salivary gland (PSG)***

296           The posterior salivary gland is the primary venom-producing gland in octopods.  
297 Venom composition in the majority of octopods is primarily composed of proteinaceous  
298 toxins. *Hapalochlaena* is an exception containing an additional non-proteinaceous  
299 neurotoxin, TTX, within their venom. We hypothesize that the *Hapalochlaena* PSG will  
300 exhibit a loss of redundant proteinaceous toxins due to the presence of TTX.

301           Examination of all PSG-specific genes from the three octopods revealed a  
302 disproportionate number of genes exclusive to *H. maculosa* (Fig 3a). A total of 623

303 genes were exclusive to *H. maculosa* PSG compared to only 230 and 164 exclusive to *O.*  
304 *bimaculoides* and *C. minor* PSGs, respectively. Additionally, we predict that the *H.*  
305 *maculosa* PSG is functionally more diverse based on the number of Pfam families  
306 detected, 532 in total. Comparatively, the PSG genes in *O. bimaculoides* and *C. minor*  
307 are fewer and more specialised. Gene family expansions of serine proteases dominate  
308 expression comprising over 30% of total PSG-specific expression in *C. minor* and 17-  
309 20% in *O. bimaculoides* (Fig 3b). Serine proteases were also among genes whose  
310 expression appears to have shifted between octopod species. Several serine proteases  
311 show specific expression to the PSG of *O. bimaculoides* and *C. minor* while being  
312 expressed in a non-specific pattern among brain, skin, muscle and anterior salivary  
313 gland tissues in *H. maculosa* (Fig 4b). Most notable is the absence of many paralogs in  
314 both *H. maculosa* and *O. bimaculoides* suggesting a lineage-specific expansion of this  
315 cluster in *C. minor*. Fewer serine protease genes can also be observed in *H. maculosa*  
316 (Fig 4c). Similarly, reprotolysin (M12B) exhibits shifting expression in *H. maculosa*,  
317 presumably from the PSG to the branchial heart, and a complete loss of paralogs from  
318 the genome. While the function of this protein has not been assessed in octopus,  
319 members of this protein family exhibit anticoagulant properties in snake venom<sup>75-78</sup>.

320 Serine proteases have been previously documented in cephalopod venom and  
321 are prime candidates for conserved toxins in octopods. Cephalopod-specific expansions  
322 have been identified with strong association to the PSG in 11 cephalopods (seven  
323 octopus, two squid and two cuttlefish)<sup>8,13</sup>. All serine proteases identified from the PSG  
324 of these species were found to belong to the cephalopod-specific clade. Functionally,  
325 cephalopod venom serine proteases have yet to be assessed. However, octopod venom  
326 has been observed to have strong digestive and hemolytic properties, which may be in  
327 part due to this crucial protein family<sup>79-81</sup>. The reduced number and expression of  
328 serine proteases in *H. maculosa* suggests a change in function of the PSG for this  
329 species. These results support the hypothesis of toxin redundancy in the *H. maculosa*  
330 PSG due to the incorporation of tetrodotoxin. Previous proteomic analysis of the *H.*  
331 *maculosa* PSG revealed high expression of hyaluronidase, which often serves as a  
332 dispersal factor within snake venom, facilitating the spread of toxin while not being  
333 directly toxic to their prey<sup>9,82</sup>. While further investigation is required, the incorporation  
334 of TTX within *H. maculosa* venom may have contributed to a shift in function, with  
335 proteins present acting to support the spread of venom and digestion of tissues.  
336

337 **Fig 4. Examination of posterior salivary gland (PSG) gene expression between three octopod**  
338 **genomes. a)** Heatmap of genes expressed specifically in the PSG of *H. maculosa* ( $\tau > 0.8$ ) and their  
339 orthologs in *O. bimaculoides* and *C. minor* lacking specific expression to the PSG ( $\tau < 0.8$ ). Genes with  
340 an ortholog lacking expression are coloured in grey while the absence of an ortholog is white. **b)**  
341 Heatmap of genes expressed specifically in the (PSG) of both *O. bimaculoides* and *C. minor* ( $\tau > 0.8$ )  
342 and their orthologs in *H. maculosa* lacking specific expression to the PSG.

343

#### 344 ***TTX resistance of the Na<sub>v</sub> channels***

345 To identify the mechanism of TTX resistance in *H. maculosa*, the voltage gated  
346 sodium channel (Na<sub>v</sub>) sequences were compared between susceptible (human) and  
347 resistant (pufferfish, salamanders and garter snakes) species. TTX binds to the p-loop  
348 regions of sodium channels, inhibiting the flow of sodium ions in neurons, resulting in  
349 paralysis<sup>83,84</sup>. Inhibition of TTX binding has been observed in species which either  
350 ingest TTX via prey, such as garter snakes<sup>85</sup>, and in those which retain TTX within their  
351 tissues like pufferfish<sup>86</sup>.

352 Two Na<sub>v</sub> genes were identified in the *H. maculosa* genome (Na<sub>v</sub>1 and Na<sub>v</sub>2), this  
353 is congruent with the recent identification of two Na<sub>v</sub> isoforms in *H.*



354 *lunulata*<sup>24</sup>(Supplementary Fig 8 & 9). Among cephalopods with sequenced Na<sub>v</sub>1  
355 channels, p-loop regions are highly conserved with both DI and DII shared between all  
356 species. The regions DIII and DIV closer to the C-terminal end of the protein in  
357 *Hapalochlaena* sp. contain mutations, which may impact TTX binding and differ  
358 between families and species as follows. Similar to the pufferfish (*Arothron*,  
359 *Canthigaster*, *Takifugu* and *Tetraodon*)<sup>87</sup>and garter snake *Thamnophis couchii*<sup>88</sup>, *H.*  
360 *maculosa* Nav1 has a mutation within the third p-loop at site (DIII) from M1406T,  
361 while all other cephalopods have an Ile(I) at this position (Fig 5a). The dumbo octopus  
362 (*Grimpoteuthis*) is the only exception retaining the susceptible M at this site similar to  
363 humans and other non-resistant mammals<sup>83</sup>. Additionally, the fourth p-loop (DIV) in *H.*  
364 *maculosa* exhibits two substitutions at known TTX binding sites: D1669H and H1670S.  
365 In a previous study a Met to Thr substitution into a TTX sensitive Nav1.4 channel  
366 decreased binding affinity to TTX by 15-fold<sup>87</sup>. Likewise, a 10-fold increase in  
367 sensitivity was observed from a T1674M substitution in a mite (*Varroa destructor*)  
368 channel VdNav1<sup>28</sup>. However, resistance is often a result of multiple substitutions and  
369 when I1674T/D1967S occur together in VdNav1, resistance is multiplicative resulting  
370 in “super resistant” channels with binding inhibition of 1000-fold. The combination of

371 M1406T/ D1669H in *H. maculosa* also occurs in the turbellarian flatworm *Bdelloura*  
372 *candida*(BcNav1)<sup>87,89</sup>. While it has yet to be assessed for TTX resistance, the replacement  
373 of Asp in *B. candida* with a neutral amino acid has been predicted to disrupt TTX  
374 binding by preventing formation of a hydrogen bond<sup>90</sup>. These three substitutions  
375 (M1406T, D1669H and H1670S) in *H. maculosa*, with the potential to inhibit TTX  
376 binding, have also been identified by Geffeney et al<sup>24</sup> in *H. lunulata*. It has yet to be  
377 established if these mutations are derived from a shared ancestor or have occurred  
378 independently.

379         While *Hapalochlaena* remains the best documented example of TTX resistance  
380 among cephalopods, other species may contain some level of TTX resistance (e.g.  
381 *Octopus vulgaris*)<sup>91,92</sup>. Saxitoxin (STX) is a similar toxin in structure and function, and  
382 mutations resistant to TTX are often also STX inhibiting<sup>93</sup> *O. vulgaris* has been observed  
383 consuming STX-contaminated bivalves with no negative impacts and as such is  
384 believed to be resistant<sup>92</sup>. However, no mutations known to reduce TTX/STX binding  
385 affinity occur in its Nav1<sup>92,94</sup>. The selective pressure facilitating the evolution of  
386 STX/TTX resistance in these shallow water benthic octopods may be toxic prey, similar  
387 to garter snakes. STX is also known as a paralytic shellfish poison (PSP). Produced by

388 photosynthetic dinoflagellates and bioaccumulated in bivalves<sup>95</sup>, this toxin  
389 contaminates a common octopus food source. Pelagic squids such as the Humboldt (*D.*  
390 *gigas*) and longfin inshore squid (*D. pealeii*) do not appear to be TTX/STX resistant;  
391 mass strandings of Humboldt squid have been associated with ingestion of STX-  
392 contaminated fish<sup>96</sup>. Likewise, no evidence of resistance was found in the sodium  
393 channel of the dumbo octopus (*Grimpototeuthis*). This species typically inhabits depths of  
394 2000-5000m and is unlikely to encounter STX-contaminated food sources<sup>97</sup>.

395

396 **Fig 5. Mechanism of tetrodotoxin resistance within the posterior salivary gland of *H. maculosa***  
397 **(PSG) a)** Alignment of voltage gated sodium channel alpha subunits (DI, DII, DIII & DIV) p-loop regions.  
398 Mutations conferring resistance are coloured in green (pufferfish), orange (salamander), purple (clam)  
399 and blue (octopus). Susceptible mutations at the same site are Black and bolded. Sites which may be  
400 involved with resistance are in bold. **b)** Schematic of voltage-gated sodium channel (Na<sub>v</sub>) alpha subunits  
401 (DI, DII, DIII and DIV). Each unit is composed of six subunits 1-4 (blue) and 5-6 (yellow). Alternating  
402 extra and intercellular loops are shown in black with the p-loops between subunits 5 and 6 highlighted  
403 in red. Mutations conferring resistance are shown within black circles on p-loops.

404

405 ***Microbiome of the PSG***

406 TTX is produced through a wide variety of bacteria, which are common in  
407 marine sediments and have been isolated from organisms such as pufferfish<sup>25,98,99</sup>.  
408 Sequestration of TTX is not exclusive to the blue-ringed octopus among molluscs.  
409 Gastropods such as *Pleurobranchaea maculata*<sup>100</sup> and *Niotha clathrata*<sup>30</sup>, as well as some  
410 bivalves, are also capable of sequestering TTX<sup>95</sup>. The commonly held hypothesis for  
411 TTX acquisition within *Hapalochlaena* is that it is bacterial in origin, and is either  
412 ingested or endosymbiotic<sup>100,101</sup>. Analysis of a ribo-depleted RNA sample from the PSG  
413 of *H. maculosa* revealed a highly diverse composition of bacterial genera with Simpson's  
414 and Shannon's diversity indices of 4.77 and 0.94, respectively. The dominant phyla  
415 were Proteobacteria and Firmicutes, composing respectively 41% and 22% of overall  
416 bacterial species detected (Fig 5a-b). To date, 151 strains of TTX-producing bacteria  
417 have been identified from 31 genera. Of these, 104 are members of Proteobacteria<sup>102</sup>.  
418 The genera *Pseudomonas* and *Bacillus* belonging to the phyla Proteobacteria and  
419 Firmicutes, respectively, have been previously identified in the PSG of *Hapalochlaena* sp  
420 (*Octopus maculosus*)<sup>101</sup>. Examination of these bacterial strains revealed TTX production,  
421 and extracts injected into mice proved to be lethal<sup>101</sup>. A more recent study on the  
422 bacterial composition of *H. maculosa* PSG did not identify TTX-producing strains<sup>100</sup>.

423 However, only a small subset of the many strains identified were tested. Congruent  
424 with our findings the diversity of bacterial genera was high and this may complicate  
425 identification of species responsible for TTX production. The biosynthetic pathway of  
426 TTX has yet to be elucidated, and as a result, only culturable bacterial species can be  
427 tested for TTX production.

428

429 **Fig 6. Assessment of bacteria within the posterior salivary gland of *H. maculosa* (PSG).** a) Bacterial composition at  
430 the phylum level of a *H. maculosa* posterior salivary/venom gland. b) Composition of the largest Phylum,  
431 Protobacteria of a *H. maculosa* posterior salivary/venom gland.

432

### 433 ***Conclusions***

434 This work describes the genome of a unique TTX bearing mollusc, the southern  
435 blue-ringed octopus (*Hapalochlaena maculosa*). Much of cephalopod evolution is barely  
436 understood due to sparseness of genomic data. Our analysis provides the first glimpse  
437 into genomic changes underlying genome evolution of closely related octopod species.  
438 While the size, heterozygosity and repetitiveness of the blue ring genome is congruent  
439 with previously published octopod genomes, we find similar yet independent  
440 expansions of key neuronal gene families across all three species and show evidence for

441 the involvement of gene novelty in the evolution of key neuronal, reproductive, and  
442 sensory tissues. The evolution of venom in octopods also differs between species, with  
443 *H. maculosa* showing a reduction in the number and expression of serine proteases in  
444 their venom gland relative to the other octopods in this study. Inclusion of TTX in *H.*  
445 *maculosa* distinguishes this species from related octopods and is believed to impact  
446 toxin recruitment and retention, as the highly potent TTX is sufficient to subdue  
447 common octopod prey without additional toxins.

448

#### 449 ***Acknowledgements***

450 We thank Dr Mark Norman and Colin Silvey for aiding Dr Julian Finn in collection of  
451 the two blue-ringed octopus specimens. We thank Jacqui Stuart for her brilliant  
452 illustrations and work on Fig beautification. This work was supported by an Australian  
453 Biological Resources Study (ABRS) grant (ref:RF211-41). O. Simakov was supported by  
454 the Austrian Science Fund (FWF) grant P30686-B29.

455

#### 456 **Ethics declaration**

457 Animal Ethics Approval

458 Field collection of fishes, cephalopods (nautilus, squids, cuttlefishes and octopuses}  
459 and decapod crustaceans (crabs, lobsters, crayfishes and their allies) in for Museum  
460 Victoria” (Animal Ethics Committee: Museums Victoria; AEC Approval Number: 10006)

461

462 **Competing interests**

463 Authors have no conflicts/competing interests to declare.

464

465 **Data availability statement:**

466 Genomic and transcriptomic data produced and used in this paper have been made

467 available in the NCBI BioProject: PRJNA602771 under the following accession

468 numbers: raw transcriptome(SAMN13930963 - SAMN13930975), genome assembly(to

469 be provided). Voucher specimen for the transcriptome is stored at Melbourne museum

470 (number to be provided). (Data is not yet available om NCBI as we would like to

471 release it on publication).

472

473 **Code availability statement:**

474 Custom scripts and pipelines used in all of the analyses are published in

475 GitHub([https://github.com/blwhitelaw/BRO\\_annotation](https://github.com/blwhitelaw/BRO_annotation)).

476

## 477 **Abbreviations**

478 TTX: Tetrodotoxin, STX: Saxitoxin, PSG: Posterior Salivary Gland, CHGN:Chondroitin

479 N-acetylgalactosaminyltransferase, C2H2(Cys2-His2) zinc finger, Cornifin SPRR:Small

480 Proline-Rich Proteins, LINE: Long Interspersed Nuclear Element, SINE: Short

481 Interspersed Nuclear Element, Mya: Million Years Ago, BUSCO: Benchmarking

482 Universal Single-Copy Orthologs, PSMC: *Pairwise Sequentially Markovian Coalescent* and

483 MSMC:multiple sequentially Markovian coalescent

484

485

## 486 **Methods**

### 487 ***Genome sequencing and assembly***

488 DNA was extracted from a single *H. maculosa* female collected at Port Phillip Bay,

489 Victoria, Australia. Two types of Illumina libraries were constructed, standard paired

490 end and Illumina mate pairs (Supplementary data 2). Dovetail sequencing, Chicago



491 libraries improved upon original sequencing resulting in an overall coverage of 71X.  
492 Assembly-stats (<https://github.com/sanger-pathogens/assembly-stats> ) was used to  
493 ascertain the quality of the assembly and relevant metrics (Supplementary notes 1).

494

#### 495 ***Transcriptome sequencing***

496 The *H. maculosa* transcriptome was generated using 12 tissues (brain, anterior salivary  
497 gland, digestive gland, renal, brachial heart, male reproductive tract, systemic heart,  
498 eyeballs, gills, posterior salivary gland, dorsal mantle and ventral mantle tissue). RNA  
499 was extracted using the Qiagen RNeasy kit. Construction of cDNA libraries was  
500 outsourced to AGRF (Australian Genome Research Facility), Melbourne and conducted  
501 using their TruSeq mRNA Library Prep with polyA selection and unique dual indexing  
502 method. Libraries were constructed using 3 µg of RNA at a concentration of > 100  
503 ng/µ L. Each tissue was sequenced on 1/12th of an Illumina HiSeq2000 lane with one  
504 lane used in total.

505

#### 506 ***De novo transcriptome assembly***

507 *De novo* assembly of the *H. maculosa* transcriptome was conducted using sequencing  
508 data from 11 tissues (as listed above) and Trinity (v10.11.201). Default parameters  
509 were used aside from kmer coverage, which was set to three to account for the large  
510 data volume. Protein coding sequences were identified using Trinotate<sup>103</sup> and domains  
511 assigned by Interpro<sup>104</sup>.

512

### 513 ***Genome annotation***

514 Genes were annotated using a *de novo* predictor supplemented with transcriptomic  
515 evidence. Training models were produced by PASA<sup>38</sup> using a transcriptome composed  
516 of 12 tissues (as listed above) and supplied to the *de novo* predictor Augustus<sup>39</sup> along  
517 with intron, exon and repeat hints (generated by repeatmasker). Alternative splicing of  
518 gene models was also predicted using PASA. Methods used for annotation have been  
519 documented in the git [https://github.com/blwhitelaw/BRO\\_annotation](https://github.com/blwhitelaw/BRO_annotation). Additional  
520 genes were predicted by mapping raw expressed reads against the genome. Functional  
521 annotation of gene models was achieved using InterPro v72.0<sup>104</sup>. Completeness of genes  
522 was assessed using BUSCO v3 Metazoan database<sup>40</sup>.

523

524 ***Heterozygosity***

525 JELLYFISH v2.2.1 was used in conjunction with GenomeScope<sup>105</sup> to calculate  
526 heterozygosity in *H. maculosa* using a kmer frequency of 21 (Supplementary table 5).

527

528 ***Repetitive and transposable elements***

529 Repetitive and transposable elements were annotated using RepeatModeler v1.0.9  
530 (RepeatScout) and masking performed with RepeatMasker v4.0.8<sup>106</sup>(Supplementary  
531 notes 3.3). Analysis of gene associated TE was conducted by extracting TE within  
532 flanking regions 10K upstream and downstream of genes using Bedtools v2.27.1.

533

534 ***Calibration of sequence divergence with respect to time***

535 Divergence times between the molluscan genomes (*Crassostrea gigas*, *Lottia gigantea*,  
536 *Aplysia californica*, *Euprymna scolopes*, *Octopus bimaculoides*, *Callistoctopus minor* and  
537 *Haplochlæna maculosa*) and transcriptomes (*Sepia officinalis*, *Idiosepius notoides*,  
538 *Octopus kaurna* and *Octopus vulgaris*) was obtained using a mutual best hit (MBH)  
539 approach. Bioprojects for each genome used are as follows: *Crassostera gigas*  
540 (PRJNA629593 & PRJEB3535), *Lottia gigantea* (PRJNA259762 & PRJNA175706),

541 *Aplysia californica* (PRJNA629593 & PRJNA13635) and (*Euprymna scolopes*  
542 PRJNA47095). *Octopus bimaculoides* was obtained from  
543 [http://octopus.unit.oist.jp/OCTDATA/BASIC/Metazome/Obimaculoides\\_280.fa.gz](http://octopus.unit.oist.jp/OCTDATA/BASIC/Metazome/Obimaculoides_280.fa.gz). The  
544 , *Idiosepius notoides* (BioProject: PRJNA302677) transcriptome was sequenced and  
545 assembled using the same method previously described for the *H. maculosa*  
546 transcriptome. Whole genomes and transcriptomes were BLASTed against *Octopus*  
547 *bimaculoides*. The resulting hits were filtered, and alignments shared between all  
548 species extracted. A maximum likelihood phylogeny was generated using RAxML  
549 v8.0<sup>107</sup>. Phylobayes v3.3<sup>108</sup> was used to calculate divergence times (Supplementary 4.1).

550

### 551 ***Effective population size (PSMC)***

552 Historical changes in effective population size were estimated using PSMC  
553 implemented in the software MSMC<sup>109,110</sup>. To generate inputs for MSMC we selected a  
554 subset of the reads used for genome assembly corresponding to 38x coverage of reads  
555 from libraries with short (500bp) insert sizes. These were pre-processed according to  
556 GATK best practices; briefly, adapters were marked with Picard 2.2.1, reads were  
557 mapped to the *H. maculosa* genome using bwa mem v 0.7.17 and PCR duplicates

558 identified using Picard v2.2.1. In order to avoid inaccuracies due to poor coverage or  
559 ambiguous read mapping we masked regions where short reads would be unable to  
560 find unique matches using SNPable (<http://lh3lh3.users.sourceforge.net/snpable.shtml>)  
561 and where coverage was more than double or less than half the genome wide average  
562 of 38x. Variant sites were called within unmasked regions and results converted to  
563 MSMC input format using msmc-tools <https://github.com/stschiff/msmc-tools>. All data  
564 for *H. maculosa* scaffolds of length greater than 1Mb was then used to generate 100  
565 bootstrap replicates by dividing data into 500kb chunks and assembling them into 20  
566 chromosomes with 100 chunks each. We then ran msmc2 on each bootstrap replicate  
567 and assembled imported the resulting data into R for plotting. A mutation rate of 2.4e-  
568 9 per base per year and a generation time of 1 year were assumed in order to set a  
569 timescale in years and convert coalescence rates to effective population size.

570

### 571 ***Mutation rate***

572 Mutation rate was calculated by extracting orthologous genes from *O. bimaculoides* and  
573 *H. maculosa*. Neutrality was assumed for genes with very low expression (> 10 TPM  
574 across all tissues). Neutral genes were aligned using MAFFT v7.407<sup>111</sup> and codeml<sup>112</sup>

575 was used to calculate substitution metrics (dS). Per base neutral substitution between  
576 lineages was determined using the mean dS value divided by divergence time (refer to  
577 *Calibration of sequence divergence with respect to time*) over the number of generations.  
578 As octopus are diploid the rate was divided by two. Divergence between species was  
579 calculated using Phylobayes v3.3<sup>108</sup>.

580

### 581 ***Quantifying gene expression/ specificity***

582 Gene expression within individual tissues was calculated using Kallisto<sup>113</sup> for the  
583 transcriptomic data sets of *H. maculosa*, *O. bimaculoides* and *C. minor*. Defaults were  
584 used and counts were calculated as TPM. Gene specificity was defined as any gene with  
585 a tau value > 0.80.

586

### 587 ***Gene model expression dynamics***

588 Patterns of gene expression and loss were assessed across octopod genomes at differing  
589 taxonomic/organismal levels. Gene models were classified as lineage-specific, octopod  
590 specific or non-specific (orthologous to a gene outside of octopods). Expression at each  
591 level was determined using whole transcriptomes from all tissues of each species. Genes

592 with expression within one or more tissues were determined to be expressed, loss of  
593 expression was classified as a gene with a single ortholog in each species, which is  
594 expressed in one or more species and not expressed in the remaining species.

595

### 596 *Dynamics of PSG gene expression*

597 In order to identify patterns of PSG specific gene expression (losses and shifts) between  
598 the three available octopod genomes, genes with expression specific to the PSG of each  
599 species were examined separately. Specific gene expression was defined as a tau value  
600  $> 0.8$ . Orthologous groups were identified between species using OrthoVenn2<sup>114</sup> and  
601 sequences which were identified as lineage-specific were confirmed using BLAST. Types  
602 of expressions were categorized as follows: A loss of expression requires a gene to be  
603 present in all three octopods and expressed in one or more species while having no  
604 detectable expression in at least one species. A shift in expression occurs when an  
605 ortholog present in all species is expressed in different tissues.

606

### 607 *The role of the Nav in TTX resistance*

608 Sodium channels for the three octopus genomes along with all available in-house  
609 cephalopod transcriptomes were extracted manually using a series of BLAST searches  
610 against the nr database. Annotation was achieved using Interpro v72.0<sup>104</sup> and  
611 identification and extraction of p-loop regions of the sodium channel alpha subunit  
612 were manually performed. Where sodium channels were incomplete alignment against  
613 related complete channels were used to extract the p-loop regions. Individual  
614 mutations with potential to confer resistance were identified manually in Geneious  
615 v10.1 (<https://www.geneious.com>).

616

617

### 618 ***Microbiome of PSG***

619 A single ribo-depleted RNA sample of *H. maculosa* PSG was examined using the  
620 SAMSA2 pipeline<sup>115</sup> to identify the bacterial composition and corresponding molecular  
621 functions. Two databases were used Subsys and NCBI RefBac. The Krona package<sup>116</sup>  
622 was used to produce visualizations of each dataset.

623

### 624 **Supplementary Information**



625 Supplementary Notes 1-8, Supplementary Tables 1-8, Supplementary Figs 1-10

626 Supplementary Data 2: Table of genomic Illumina library insert sizes

627

628

629 **References**

630

- 631 1. Ritschard, E. A. *et al.* Coupled Genomic Evolutionary Histories as Signatures of  
632 Organismal Innovations in Cephalopods. *BioEssays* (2019).
- 633 2. Tanner, A. R. *et al.* Molecular clocks indicate turnover and diversification of  
634 modern coleoid cephalopods during the Mesozoic Marine Revolution. *Proc. R.*  
635 *Soc. B Biol. Sci.* **284**, 20162818 (2017).
- 636 3. Jereb Roper, C. F. E., Norman, M. D., and Finn, J. K., P. Cephalopods of the  
637 world. An annotated and illustrated catalogue of cephalopod species known to  
638 date,” in *Octopods and Vampire Squids*, Vol. 3., *Rome FAO* (2014).
- 639 4. Graziadei, P. P. C. & Gagne, H. T. Sensory innervation in the rim of the octopus  
640 sucker. *J. Morphol.* **150**, 639–679 (1976).
- 641 5. Froesch, D. Projection of chromatophore nerves on the body surface of *Octopus*  
642 *vulgaris*. *Mar. Biol.* **19**, 153–155 (1973).
- 643 6. Budelmann, B. U. The cephalopod nervous system: what evolution has made of  
644 the molluscan design. in *The nervous systems of invertebrates: An evolutionary and*  
645 *comparative approach* 115–138 (Springer, 1995).
- 646 7. Gray, E. G. & Young, J. Z. Electron microscopy of synaptic structure of *Octopus*  
647 brain. *J. Cell Biol.* **21**, 87–103 (1964).
- 648 8. Fingerhut, L. C. H. W. *et al.* Shotgun proteomics analysis of saliva and salivary  
649 gland tissue from the common octopus *Octopus vulgaris*. *J. Proteome Res.* **17**,  
650 3866–3876 (2018).
- 651 9. Whitelaw, B. L., Cooke, I. R., Finn, J., Zenger, K. & Strugnell, J. M. The evolution  
652 and origin of tetrodotoxin acquisition in the blue-ringed octopus (genus  
653 *Hapalochlaena*). *Aquat. Toxicol.* **206**, (2019).
- 654 10. Cooke, I. R., Whitelaw, B., Norman, M., Caruana, N. & Strugnell, J. M. Toxicity in

- 655 cephalopods. *Evol. Venom. Anim. Their Toxins* 1–15 (2015).
- 656 11. Whitelaw, B. L. *et al.* Combined Transcriptomic and Proteomic Analysis of the  
657 Posterior Salivary Gland from the Southern Blue-Ringed Octopus and the  
658 Southern Sand Octopus. *J. Proteome Res.* **15**, (2016).
- 659 12. Fry, B. G., Roelants, K. & Norman, J. A. Tentacles of venom: toxic protein  
660 convergence in the Kingdom Animalia. *J. Mol. Evol.* **68**, 311–321 (2009).
- 661 13. Ruder, T. *et al.* Molecular phylogeny and evolution of the proteins encoded by  
662 coleoid (cuttlefish, octopus, and squid) posterior venom glands. *J. Mol. Evol.* **76**,  
663 192–204 (2013).
- 664 14. Fry, B. G. *et al.* Functional and structural diversification of the anguimorpha  
665 lizard venom system. *Mol. Cell. Proteomics* (2010)  
666 doi:10.1074/mcp.M110.001370.
- 667 15. Hendon, R. A. & Tu, A. T. Biochemical Characterization of the Lizard Toxin  
668 Gilatoxin. *Biochemistry* (1981) doi:10.1021/bi00515a033.
- 669 16. Matsui, T., Fujimura, Y. & Titani, K. Snake venom proteases affecting hemostasis  
670 and thrombosis. *Biochimica et Biophysica Acta - Protein Structure and Molecular*  
671 *Enzymology* (2000) doi:10.1016/S0167-4838(99)00268-X.
- 672 17. Mitreva, M. *et al.* Novel venom gene discovery in the platypus. *Genome Biol.* **11**,  
673 1–13 (2010).
- 674 18. Choo, Y. M. *et al.* Antifibrinolytic role of a bee venom serine protease inhibitor  
675 that acts as a plasmin inhibitor. *PLoS One* (2012)  
676 doi:10.1371/journal.pone.0032269.
- 677 19. Veiga, S. S. *et al.* Identification of high molecular weight serine-proteases in  
678 *Loxosceles intermedia* (brown spider) venom. *Toxicon* (2000)  
679 doi:10.1016/S0041-0101(99)00197-X.
- 680 20. Modica, M. V., Lombardo, F., Franchini, P. & Oliverio, M. The venomous cocktail  
681 of the vampire snail *Colubraria reticulata* (Mollusca, Gastropoda). *BMC Genomics*  
682 **16**, 1–21 (2015).
- 683 21. von Reumont, B. M., Undheim, E. A. B., Jauss, R. T. & Jenner, R. A. Venomics of  
684 remipede crustaceans reveals novel peptide diversity and illuminates the venom's  
685 biological role. *Toxins (Basel)*. (2017) doi:10.3390/toxins9080234.
- 686 22. Jaimes-Becerra, A. *et al.* Comparative proteomics reveals recruitment patterns of  
687 some protein families in the venoms of Cnidaria. *Toxicon* **137**, 19–26 (2017).

- 688 23. Crone, H. D., Leake, B., Jarvis, M. W. & Freeman, S. E. On the nature of  
689 “Maculotoxin”, a toxin from the blue-ringed octopus (*Hapalochlaena maculosa*).  
690 *Toxicon* **14**, 423–426 (1976).
- 691 24. Geffeney, S. L. *et al.* Convergent and parallel evolution in a voltage-gated sodium  
692 channel underlies TTX-resistance in the Greater Blue-ringed Octopus:  
693 *Hapalochlaena lunulata*. *Toxicon* (2019).
- 694 25. Wu, Z. *et al.* Toxicity and distribution of tetrodotoxin-producing bacteria in puffer  
695 fish *Fugu rubripes* collected from the Bohai Sea of China. *Toxicon* **46**, 471–476  
696 (2005).
- 697 26. Tsuruda, K. *et al.* Secretory glands of tetrodotoxin in the skin of the Japanese  
698 newt *Cynops pyrrhogaster*. *Toxicon* **40**, 131–136 (2002).
- 699 27. Wakely, J. F., Fuhrman, G. J., Fuhrman, F. A., Fischer, H. G. & Mosher, H. S. The  
700 occurrence of tetrodotoxin (tarichatoxin) in Amphibia and the distribution of the  
701 toxin in the organs of newts (*Taricha*). *Toxicon* **3**, 195–203 (1966).
- 702 28. Du, Y., Nomura, Y., Liu, Z., Huang, Z. Y. & Dong, K. Functional expression of an  
703 arachnid sodium channel reveals residues responsible for tetrodotoxin resistance  
704 in invertebrate sodium channels. *J. Biol. Chem.* **284**, 33869–33875 (2009).
- 705 29. McGlothlin, J. W. *et al.* Parallel evolution of tetrodotoxin resistance in three  
706 voltage-gated sodium channel genes in the garter snake *Thamnophis sirtalis*. *Mol.*  
707 *Biol. Evol.* **31**, 2836–2846 (2014).
- 708 30. Cheng, C. A. *et al.* Microflora and tetrodotoxin-producing bacteria in a gastropod,  
709 *Niotha clathrata*. *Food Chem. Toxicol.* **33**, 929–934 (1995).
- 710 31. Williams, B. L. & Caldwell, R. L. Intra-organismal distribution of tetrodotoxin in  
711 two species of blue-ringed octopuses (*Hapalochlaena fasciata* and *H. lunulata*).  
712 *Toxicon* **54**, 345–353 (2009).
- 713 32. Yotsu-Yamashita, M., Mebs, D. & Flachsenberger, W. Distribution of tetrodotoxin  
714 in the body of the blue-ringed octopus (*Hapalochlaena maculosa*). *Toxicon* **49**,  
715 410–412 (2007).
- 716 33. Mäthger, L. M., Bell, G. R. R., Kuzirian, A. M., Allen, J. J. & Hanlon, R. T. How  
717 does the blue-ringed octopus (*Hapalochlaena lunulata*) flash its blue rings? *J.*  
718 *Exp. Biol.* **215**, 3752–3757 (2012).
- 719 34. Williams, B. L., Stark, M. R. & Caldwell, R. L. Microdistribution of tetrodotoxin in  
720 two species of blue-ringed octopuses (*Hapalochlaena lunulata* and *Hapalochlaena*

- 721 fasciata) detected by fluorescent immunolabeling. *Toxicon* **60**, 1307–1313  
722 (2012).
- 723 35. Savage, I. V. E. & Howden, M. E. H. Hapalotoxin, a second lethal toxin from the  
724 octopus *Hapalochlaena maculosa*. *Toxicon* **15**, 463–466 (1977).
- 725 36. Kanda, A., Iwakoshi-Ukena, E., Takuwa-Kuroda, K. & Minakata, H. Isolation and  
726 characterization of novel tachykinins from the posterior salivary gland of the  
727 common octopus *Octopus vulgaris*. *Peptides* **24**, 35–43 (2003).
- 728 37. Ruder, T. *et al.* Functional characterization on invertebrate and vertebrate tissues  
729 of tachykinin peptides from octopus venoms. *Peptides* **47**, 71–76 (2013).
- 730 38. Haas, B. J. *et al.* Improving the Arabidopsis genome annotation using maximal  
731 transcript alignment assemblies. *Nucleic Acids Res.* **31**, 5654–5666 (2003).
- 732 39. Stanke, M. Gene prediction with a hidden Markov model. (University of  
733 Göttingen, 2004).
- 734 40. Waterhouse, R. M. *et al.* BUSCO applications from quality assessments to gene  
735 prediction and phylogenomics. *Mol. Biol. Evol.* **35**, 543–548 (2017).
- 736 41. Zarrella, I. *et al.* The survey and reference assisted assembly of the *Octopus*  
737 *vulgaris* genome. *Sci. data* **6**, 13 (2019).
- 738 42. Albertin, C. B. *et al.* The octopus genome and the evolution of cephalopod neural  
739 and morphological novelties. *Nature* **524**, 220–224 (2015).
- 740 43. Cai, H. *et al.* A draft genome assembly of the solar-powered sea slug *Elysia*  
741 *chlorotica*. *Sci. data* **6**, 190022 (2019).
- 742 44. Liu, C. *et al.* The genome of the golden apple snail *Pomacea canaliculata* provides  
743 insight into stress tolerance and invasive adaptation. *Gigascience* **7**, giy101  
744 (2018).
- 745 45. Du, X. *et al.* The pearl oyster *Pinctada fucata martensii* genome and multi-omic  
746 analyses provide insights into biomineralization. *Gigascience* **6**, gix059 (2017).
- 747 46. Powell, D. *et al.* The genome of the oyster *Saccostrea* offers insight into the  
748 environmental resilience of bivalves. *DNA Res.* **25**, 655–665 (2018).
- 749 47. Sun, J. *et al.* Adaptation to deep-sea chemosynthetic environments as revealed by  
750 mussel genomes. *Nat. Ecol. Evol.* **1**, 121 (2017).
- 751 48. Uliano-Silva, M. *et al.* A hybrid-hierarchical genome assembly strategy to  
752 sequence the invasive golden mussel, *Limnoperna fortunei*. *Gigascience* **7**, gix128  
753 (2017).

- 754 49. Zhang, G. *et al.* The oyster genome reveals stress adaptation and complexity of  
755 shell formation. *Nature* **490**, 49 (2012).
- 756 50. Jiao, W. *et al.* High-resolution linkage and quantitative trait locus mapping aided  
757 by genome survey sequencing: building up an integrative genomic framework for  
758 a bivalve mollusc. *DNA Res.* **21**, 85–101 (2013).
- 759 51. Garton, D. W. & Haag, W. R. Heterozygosity, shell length and metabolism in the  
760 European mussel, *Dreissena polymorpha*, from a recently established population  
761 in Lake Erie. *Comp. Biochem. Physiol. Part A Physiol.* **99**, 45–48 (1991).
- 762 52. Simmons, M. J. & Crow, J. F. Mutations affecting fitness in *Drosophila*  
763 populations. *Annu. Rev. Genet.* **11**, 49–78 (1977).
- 764 53. Kumar, S. & Subramanian, S. Mutation rates in mammalian genomes. *Proc. Natl.*  
765 *Acad. Sci.* **99**, 803–808 (2002).
- 766 54. Hayward, B. W., Kawagata, S., Grenfell, H. R., Sabaa, A. T. & O'Neill, T. Last  
767 global extinction in the deep sea during the mid-Pleistocene climate transition.  
768 *Paleoceanogr. Paleoclimatology* **22**, (2007).
- 769 55. Hofreiter, M. & Stewart, J. Ecological change, range fluctuations and population  
770 dynamics during the Pleistocene. *Curr. Biol.* **19**, R584–R594 (2009).
- 771 56. Reynolds, T. V, Matthee, C. A. & Von Der Heyden, S. The influence of Pleistocene  
772 climatic changes and ocean currents on the phylogeography of the southern  
773 African barnacle, *Tetraclita serrata* (Thoracica; Cirripedia). *PLoS One* **9**, e102115  
774 (2014).
- 775 57. Huber, C. D., DeGiorgio, M., Hellmann, I. & Nielsen, R. Detecting recent selective  
776 sweeps while controlling for mutation rate and background selection. *Mol. Ecol.*  
777 **25**, 142–156 (2016).
- 778 58. Mao, Y., Economo, E. P. & Satoh, N. The roles of introgression and climate  
779 change in the rise to dominance of *Acropora* Corals. *Curr. Biol.* **28**, 3373–3382. e5  
780 (2018).
- 781 59. Kim, B.-M. *et al.* Antarctic blackfin icefish genome reveals adaptations to extreme  
782 environments. *Nat. Ecol. Evol.* **3**, 469 (2019).
- 783 60. Guzik, M. T., Norman, M. D. & Crozier, R. H. Molecular phylogeny of the benthic  
784 shallow-water octopuses (Cephalopoda: Octopodinae). *Mol. Phylogenet. Evol.* **37**,  
785 235–248 (2005).
- 786 61. Strugnell, J., Jackson, J., Drummond, A. J. & Cooper, A. Divergence time

- 787 estimates for major cephalopod groups: evidence from multiple genes. *Cladistics*  
788 **22**, 89–96 (2006).
- 789 62. Strugnell, J. M., Rogers, A. D., Prodöhl, P. A., Collins, M. A. & Allcock, A. L. The  
790 thermohaline expressway: the Southern Ocean as a centre of origin for deep-sea  
791 octopuses. *Cladistics* **24**, 853–860 (2008).
- 792 63. Lindgren, A. R. & Anderson, F. E. Assessing the utility of transcriptome data for  
793 inferring phylogenetic relationships among coleoid cephalopods. *Mol. Phylogenet.*  
794 *Evol.* **118**, 330–342 (2018).
- 795 64. Styfhals, R., Seuntjens, E., Simakov, O., Sanges, R. & Fiorito, G. In silico  
796 Identification and Expression of Protocadherin Gene Family in *Octopus vulgaris*.  
797 *Frontiers in Physiology* (2019) doi:10.3389/fphys.2018.01905.
- 798 65. Zipursky, S. L. & Sanes, J. R. Chemoaffinity revisited: dscams, protocadherins,  
799 and neural circuit assembly. *Cell* **143**, 343–353 (2010).
- 800 66. Tepass, U., Truong, K., Godt, D., Ikura, M. & Peifer, M. Cadherins in embryonic  
801 and neural morphogenesis. *Nat. Rev. Mol. Cell Biol.* **1**, 91 (2000).
- 802 67. Peek, S. L., Mah, K. M. & Weiner, J. A. Regulation of neural circuit formation by  
803 protocadherins. *Cellular and Molecular Life Sciences* (2017) doi:10.1007/s00018-  
804 017-2572-3.
- 805 68. De Wit, J. & Ghosh, A. Specification of synaptic connectivity by cell surface  
806 interactions. *Nature Reviews Neuroscience* (2016) doi:10.1038/nrn.2015.3.
- 807 69. Layden, M. J., Meyer, N. P., Pang, K., Seaver, E. C. & Martindale, M. Q.  
808 Expression and phylogenetic analysis of the *zic* gene family in the evolution and  
809 development of metazoans. *Evodevo* **1**, 12 (2010).
- 810 70. Liu, H., Chang, L.-H., Sun, Y., Lu, X. & Stubbs, L. Deep vertebrate roots for  
811 mammalian zinc finger transcription factor subfamilies. *Genome Biol. Evol.* **6**,  
812 510–525 (2014).
- 813 71. Young, J. Z. The number and sizes of nerve cells in *Octopus*. in *Proceedings of the*  
814 *Zoological Society of London* vol. 140 229–254 (Wiley Online Library, 1963).
- 815 72. Belcaid, M. *et al.* Symbiotic organs shaped by distinct modes of genome evolution  
816 in cephalopods. *Proc. Natl. Acad. Sci.* 201817322 (2019)  
817 doi:10.1073/pnas.1817322116.
- 818 73. Kim, B.-M. *et al.* The genome of common long-arm octopus *Octopus minor*.  
819 *Gigascience* **7**, giy119 (2018).

- 820 74. Kapitonov, V. V & Jurka, J. Rolling-circle transposons in eukaryotes. *Proc. Natl.*  
821 *Acad. Sci.* **98**, 8714–8719 (2001).
- 822 75. Oulion, B. *et al.* Factor X activating Atractaspis snake venoms and the relative  
823 coagulotoxicity neutralising efficacy of African antivenoms. *Toxicol. Lett.* (2018)  
824 doi:10.1016/j.toxlet.2018.02.020.
- 825 76. Rogalski, A. *et al.* Differential procoagulant effects of saw-scaled viper (Serpentes:  
826 Viperidae: Echis) snake venoms on human plasma and the narrow taxonomic  
827 ranges of antivenom efficacies. *Toxicol. Lett.* **280**, 159–170 (2017).
- 828 77. Sousa, L. F. *et al.* Coagulotoxicity of Bothrops (lancehead pit-vipers) venoms from  
829 Brazil: Differential biochemistry and antivenom efficacy resulting from prey-  
830 driven venom variation. *Toxins (Basel)*. (2018) doi:10.3390/toxins10100411.
- 831 78. Fox, J. W. & Serrano, S. M. T. Structural considerations of the snake venom  
832 metalloproteinases, key members of the M12 reprotolysin family of  
833 metalloproteinases. *Toxicon* **45**, 969–985 (2005).
- 834 79. Grisley, M. S. & Boyle, P. R. Bioassay and proteolytic activity of digestive  
835 enzymes from octopus saliva. *Comp. Biochem. Physiol. Part B Comp. Biochem.* **88**,  
836 1117–1123 (1987).
- 837 80. Key, L. N., Boyle, P. R. & Jaspars, M. Novel activities of saliva from the octopus  
838 *Eledone cirrhosa* (Mollusca; Cephalopoda). *Toxicon* **40**, 677–683 (2002).
- 839 81. McDonald, N. M. & Cottrell, G. A. Purification and mode of action of toxin from  
840 *Eledone cirrhosa*. *Comp. Gen. Pharmacol.* **3**, 243–248 (1972).
- 841 82. Bordon, K. C. F., Perino, M. G., Giglio, J. R. & Arantes, E. C. Isolation, enzymatic  
842 characterization and antiedematogenic activity of the first reported rattlesnake  
843 hyaluronidase from *Crotalus durissus terrificus* venom. *Biochimie* **94**, 2740–2748  
844 (2012).
- 845 83. Frank, H. Y. & Catterall, W. A. Overview of the voltage-gated sodium channel  
846 family. *Genome Biol.* **4**, 207 (2003).
- 847 84. How, C.-K., Chern, C.-H., Huang, Y.-C., Wang, L.-M. & Lee, C.-H. Tetrodotoxin  
848 poisoning. *Am. J. Emerg. Med.* **21**, 51–54 (2003).
- 849 85. Brodie III, E. D. & Brodie Jr, E. D. Tetrodotoxin resistance in garter snakes: an  
850 evolutionary response of predators to dangerous prey. *Evolution (N. Y.)*. **44**, 651–  
851 659 (1990).
- 852 86. Nakamura, M. & Yasumoto, T. Tetrodotoxin derivatives in puffer fish. *Toxicon* **23**,

- 853 271–276 (1985).
- 854 87. Jost, M. C. *et al.* Toxin-resistant sodium channels: parallel adaptive evolution  
855 across a complete gene family. *Mol. Biol. Evol.* **25**, 1016–1024 (2008).
- 856 88. Feldman, C. R., Brodie, E. D. & Pfrender, M. E. Constraint shapes convergence in  
857 tetrodotoxin-resistant sodium channels of snakes. *Proc. Natl. Acad. Sci.* **109**,  
858 4556–4561 (2012).
- 859 89. Jeziorski, M. C., Greenberg, R. M. & Anderson, P. A. V. Cloning of a putative  
860 voltage-gated sodium channel from the turbellarian flatworm *Bdelloura candida*.  
861 *Parasitology* **115**, 289–296 (1997).
- 862 90. Geffeney, S. L., Fujimoto, E., Brodie III, E. D., Brodie Jr, E. D. & Ruben, P. C.  
863 Evolutionary diversification of TTX-resistant sodium channels in a predator–prey  
864 interaction. *Nature* **434**, 759 (2005).
- 865 91. Flachsenberger, W. & Kerr, D. I. B. Lack of effect of tetrodotoxin and of an extract  
866 from the posterior salivary gland of the blue-ringed octopus following injection  
867 into the octopus and following application to its brachial nerve. *Toxicon* **23**, 997–  
868 999 (1985).
- 869 92. Lopes, V. M., Baptista, M., Repolho, T., Rosa, R. & Costa, P. R. Uptake, transfer  
870 and elimination kinetics of paralytic shellfish toxins in common octopus (*Octopus*  
871 *vulgaris*). *Aquat. Toxicol.* **146**, 205–211 (2014).
- 872 93. Ulbricht, W., Wagner, H. & Schmidt Mayer, J. Kinetics of TTX-STX Block of  
873 Sodium Channels. *Ann. N. Y. Acad. Sci.* **479**, 68–83 (1986).
- 874 94. Monteiro, A. & Costa, P. R. Distribution and selective elimination of paralytic  
875 shellfish toxins in different tissues of *Octopus vulgaris*. *Harmful Algae* **10**, 732–  
876 737 (2011).
- 877 95. Li, S.-C., Wang, W.-X. & Hsieh, D. Feeding and absorption of the toxic  
878 dinoflagellate *Alexandrium tamarense* by two marine bivalves from the South  
879 China Sea. *Mar. Biol.* **139**, 617–624 (2001).
- 880 96. Braid, H. E. *et al.* Preying on commercial fisheries and accumulating paralytic  
881 shellfish toxins: a dietary analysis of invasive *Dosidicus gigas* (Cephalopoda  
882 Ommastrephidae) stranded in Pacific Canada. *Mar. Biol.* **159**, 25–31 (2012).
- 883 97. Shea, E. K., Ziegler, A., Faber, C. & Shank, T. M. Dumbo octopod hatchling  
884 provides insight into early cirrate life cycle. *Curr. Biol.* **28**, R144–R145 (2018).
- 885 98. Lee, M.-J. *et al.* A tetrodotoxin-producing *Vibrio* strain, LM-1, from the puffer fish



- 886 Fugu vermicularis radiatus. *Appl. Environ. Microbiol.* **66**, 1698–1701 (2000).
- 887 99. Yotsu, M. *et al.* Production of tetrodotoxin and its derivatives by *Pseudomonas* sp.  
888 isolated from the skin of a pufferfish. *Toxicon* **25**, 225–228 (1987).
- 889 100. Chau, R., Kalaitzis, J., Wood, S. & Neilan, B. Diversity and biosynthetic potential  
890 of culturable microbes associated with toxic marine animals. *Mar. Drugs* **11**,  
891 2695–2712 (2013).
- 892 101. Hwang, D. F. *et al.* Tetrodotoxin-producing bacteria from the blue-ringed octopus  
893 *Octopus maculosus*. *Mar. Biol.* **100**, 327–332 (1989).
- 894 102. Magarlamov, T., Melnikova, D. & Chernyshev, A. Tetrodotoxin-producing  
895 bacteria: Detection, distribution and migration of the toxin in aquatic systems.  
896 *Toxins (Basel)*. **9**, 166 (2017).
- 897 103. Bryant, D. M. *et al.* A tissue-mapped axolotl de novo transcriptome enables  
898 identification of limb regeneration factors. *Cell Rep.* **18**, 762–776 (2017).
- 899 104. Jones, P. *et al.* InterProScan 5: genome-scale protein function classification.  
900 *Bioinformatics* **30**, 1236–1240 (2014).
- 901 105. Vurture, G. W. *et al.* GenomeScope: fast reference-free genome profiling from  
902 short reads. *Bioinformatics* **33**, 2202–2204 (2017).
- 903 106. Smit Hubley, R & Green, P., A. F. A. RepeatMasker Open-4.0.
- 904 107. Stamatakis, A. RAxML-VI-HPC: maximum likelihood-based phylogenetic analyses  
905 with thousands of taxa and mixed models. *Bioinformatics* **22**, 2688–2690 (2006).
- 906 108. Guindon, S. & Gascuel, O. A simple, fast, and accurate algorithm to estimate  
907 large phylogenies by maximum likelihood. *Syst. Biol.* **52**, 696–704 (2003).
- 908 109. Li, H. & Durbin, R. Inference of human population history from whole genome  
909 sequence of a single individual. *Nature* **475**, 493 (2012).
- 910 110. Schiffels, S. & Durbin, R. Inferring human population size and separation history  
911 from multiple genome sequences. *Nat. Genet.* **46**, 919 (2014).
- 912 111. Rozewicki, J., Li, S., Amada, K. M., Standley, D. M. & Katoh, K. MAFFT-DASH:  
913 integrated protein sequence and structural alignment. *Nucleic Acids Res.* **47**, W5–  
914 W10 (2019).
- 915 112. Adachi, J. & Hasegawa, M. *MOLPHY version 2.3: programs for molecular*  
916 *phylogenetics based on maximum likelihood.* (Institute of Statistical Mathematics  
917 Tokyo, 1996).
- 918 113. Bray, N. L., Pimentel, H., Melsted, P. & Pachter, L. Near-optimal probabilistic

919 RNA-seq quantification. *Nat. Biotechnol.* **34**, 525–527 (2016).

920 114. Xu, L. *et al.* OrthoVenn2: a web server for whole-genome comparison and  
921 annotation of orthologous clusters across multiple species. *Nucleic Acids Res.* **47**,  
922 W52–W58 (2019).

923 115. Westreich, S. T., Korf, I., Mills, D. A. & Lemay, D. G. SAMSA: a comprehensive  
924 metatranscriptome analysis pipeline. *BMC Bioinformatics* **17**, 399 (2016).

925 116. Ondov, B. D., Bergman, N. H. & Phillippy, A. M. Interactive metagenomic  
926 visualization in a Web browser. *BMC Bioinformatics* **12**, 385 (2011).

927

Figure 1

a)

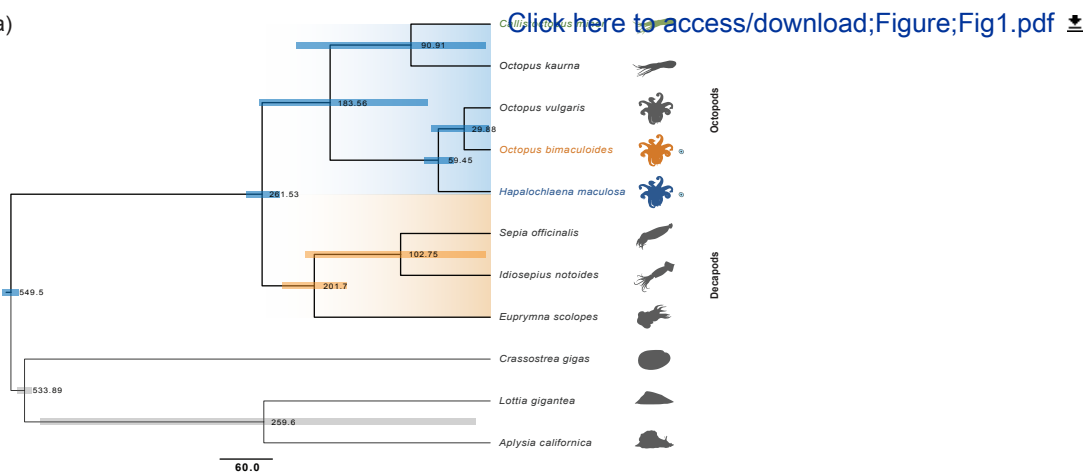

b)

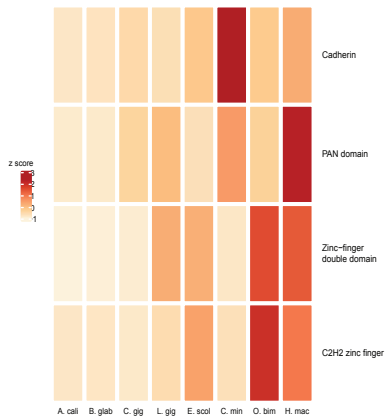

c)

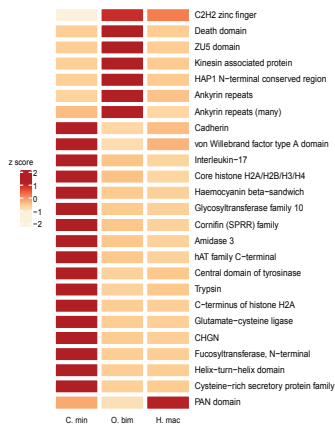

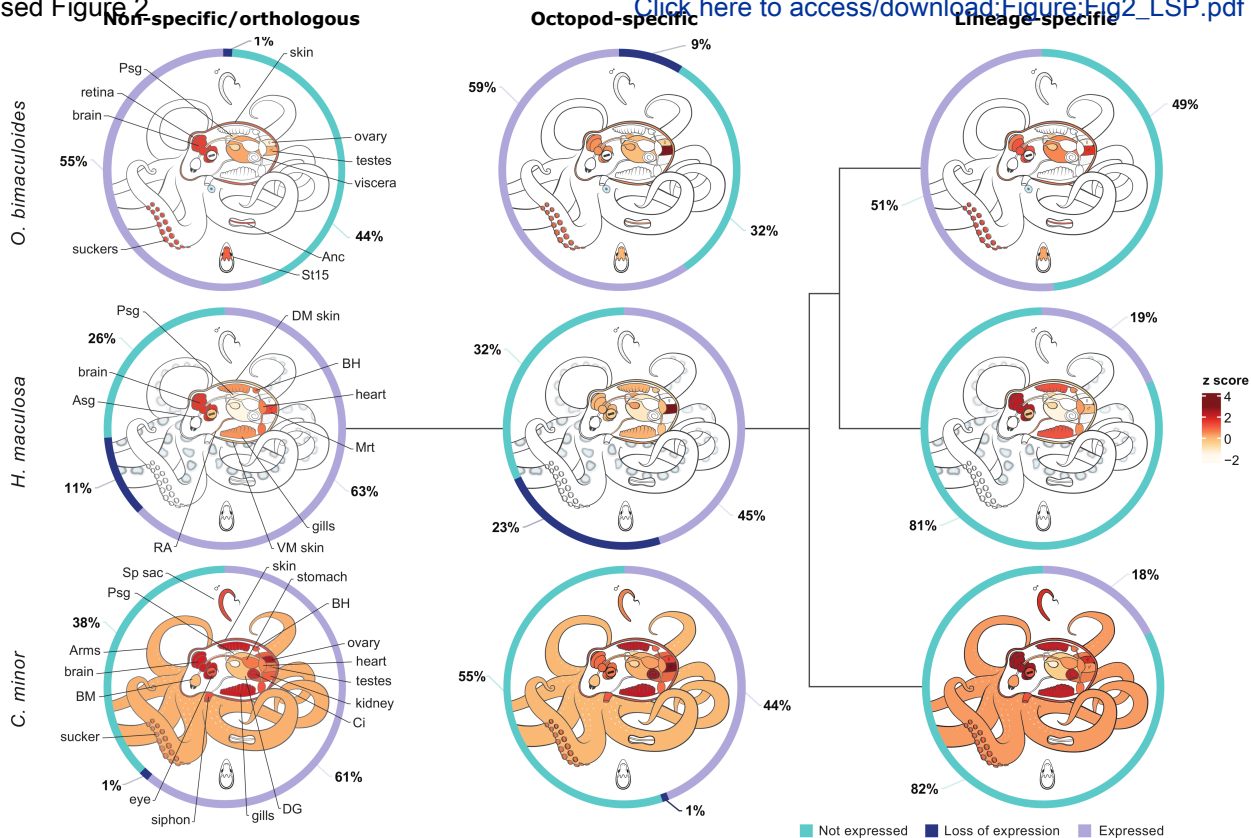



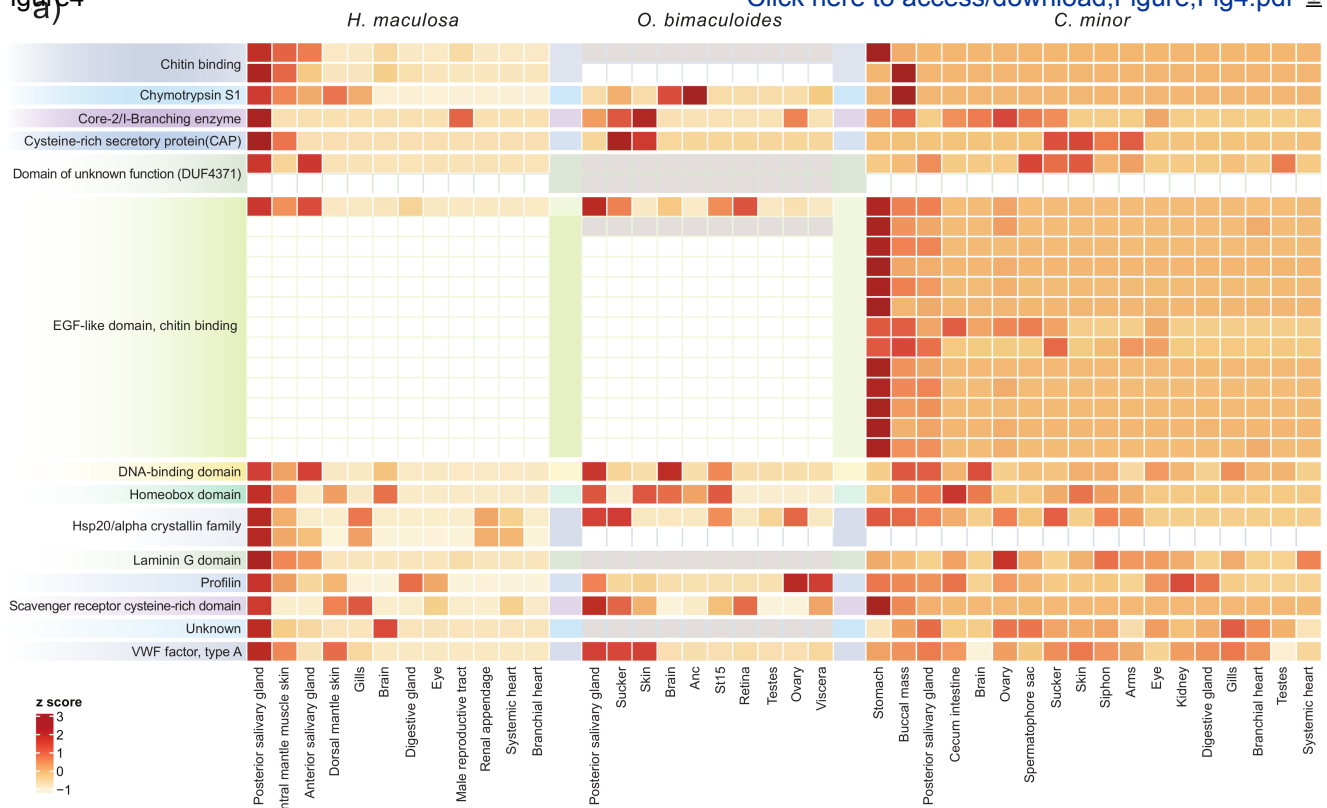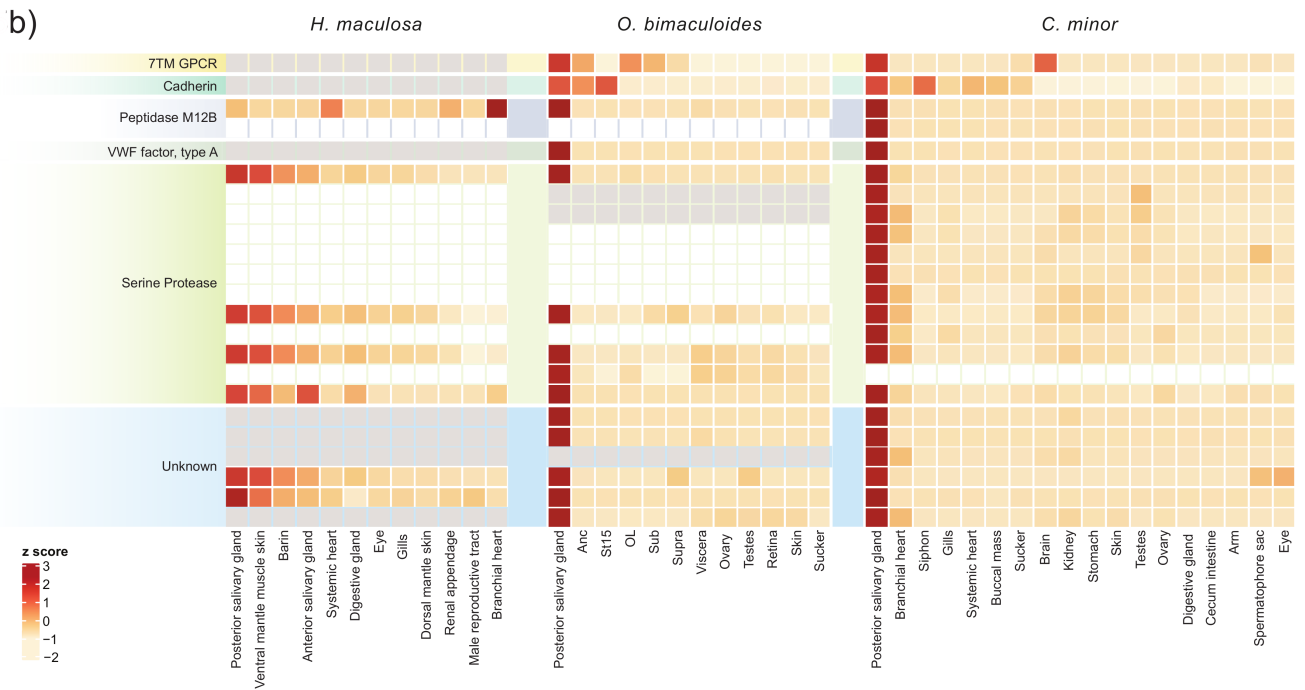

# Revised Figure 5

Click here to access/download;Figure;Fig5PTR\_Au

| consensus                      | <b>DI</b><br>DYWEN | <b>DII</b><br>EWIES | <b>DIII</b><br>RGWXL | <b>DIV</b><br>RGWDG |    |
|--------------------------------|--------------------|---------------------|----------------------|---------------------|------------------------------------------------------------------------------------|
| <i>Mya arenaria</i>            | -----              | --- <u>D</u> ---    | ---I-                | -----               |  |
| <i>Crassostrea gigas</i>       | F-----             | ---Q-               | ---IE                | -----               |  |
| <i>Mizuhopecten yessoensis</i> | -----              | -----               | --- <u>T</u> V       | ---S                |  |
| <i>Lottia gigantea</i>         | ---S-              | -----               | ---V-                | -----               |  |
| <i>Aplysia californica</i>     | F--S-              | -----               | ---I-                | ---SD               |  |
| <i>Euprymna scolopes</i>       | -----              | -----               | ---IN                | -----               |  |
| <i>Doryteuthis pealeii</i>     | -----              | -----               | ---IN                | -----               |  |
| <i>Doryteuthis opalescens</i>  | -----              | -----               | ---IN                | -----               |  |
| <i>Dosidicus gigas</i>         | -----              | -----               | ---IN                | -----               |  |
| <i>Grimpoteuthis</i>           | -----              | -----               | ---M-                | -----               |  |
| <i>Callistoctopus minor</i>    | -----              | -----               | -----                | -----               |  |
| <i>Octopus bimaculoides</i>    | -----              | -----               | ---I-                | -----               |  |
| <i>Octopus vulgaris</i>        | -----              | -----               | ---I-                | -----               |  |
| <i>Hapalochlaena maculosa</i>  | -----              | -----               | --- <u>T</u> E       | --- <b>HS</b> ☠     |  |
| <i>Hapalochlaena lunulata</i>  | -----              | -----               | --- <u>T</u> E       | --- <b>HS</b> ☠     |  |
| <i>Taricha granulosa</i>       | -----              | ---T                | --- <u>T</u> -       | ---SD ☠             |  |
| <i>Tetraodon nigroviridis</i>  | <u>C</u> ----      | ---N                | --- <u>T</u> A       | GG--Q ☠             |  |
| Homo sapiens                   | -----              | ---T                | ---M-                | ---G                |  |

b)

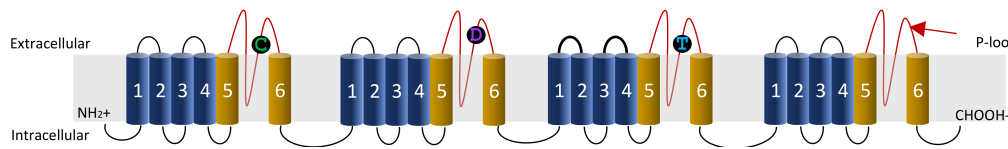

Figure 6

[Click here to access/download;Figur](#)

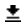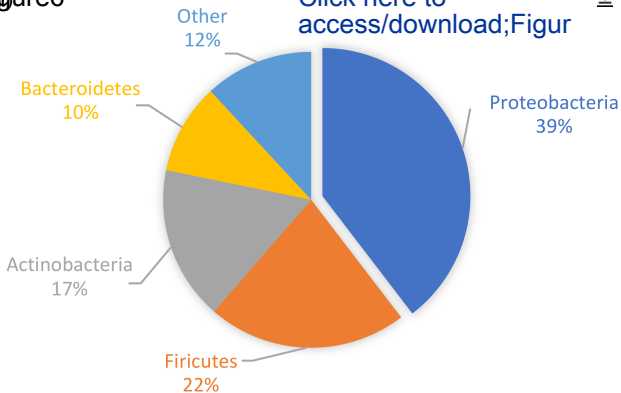

b)

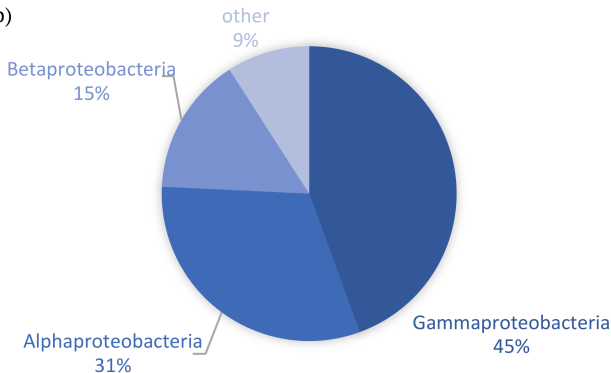



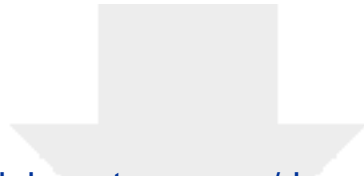

Click here to access/download

**Supplementary Material**

**SUPPLEMENTARY MATERIALS\_GS2\_5\_8\_2020.docx**

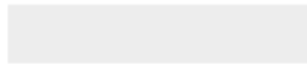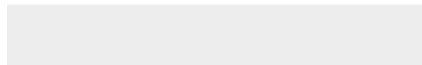

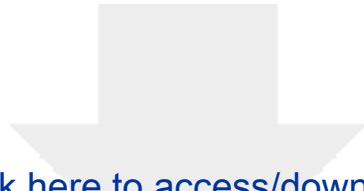

Click here to access/download  
**Supplementary Material**  
BRO Sequencing Insert Sizes.xlsx

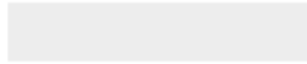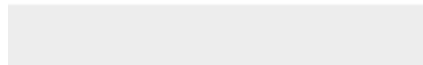

Dear Dr. Goodman

I am pleased to submit an original research piece titled “**Adaptive venom evolution and toxicity in octopods is driven by extensive novel gene formation, expansion and loss**” for consideration to be published in *GigaScience*.

Much of cephalopod evolution remains unknown due to sparseness of their genomic sampling. Cephalopod genomes are some of the largest and most repetitive animal genomes and exhibit drastically different evolutionary trajectories relative to other better documented lineages. A more focused genomic study to reveal how individual genomic changes are associated with the evolution of novel organs, tissues, or adaptations, within a single group of cephalopods has been missing so far. We present such a study, focussing on adaptations in the toxic blue-ringed octopus the *Hapalochlaena maculosa*, for which we provide a high quality genome assembly based on multiple technologies. Members of the genus *Hapalochlaena* are the only octopods to contain the lethal neurotoxin, tetrodotoxin (TTX), within their venom and tissues and are a prime example of the origin of evolutionary novelties within octopods.

Using global comparative genomics approaches and focused study on TTX evolution, we report key findings:

- Gene family expansions crucial for the development of complex neural networks are present in cephalopods, yet are differentially expanding in all three octopod species
- Novel gene formation at different phylogenetic levels can be associated with evolution in a specific set of cephalopod tissues
- Changes in Posterior Salivary Gland composition (PSG) between TTX bearing and non-TTX bearing species
- Convergently evolved mutations consistent with TTX resistance detected in *H. maculosa*

We firmly believe that our manuscript is suited for publication by *GigaScience* as one of the first to explore the evolutionary genomic basis for novelties within octopods and cephalopods in general. Our whole genomic comparisons provide insight into the defining structure/features of octopod genomes at the species-specific level. Additionally, we

examine the impact of TTX on the evolution of venom in *H. maculosa* relative to non-TTX bearing octopods.

Yours sincerely,

Brooke L. Whitelaw  
James Cook University,  
Townsville, QLD 4810  
Mobile: 0424642621  
brooke.whitelaw@my.jcu.edu.au

Assoc. Prof. Jan Strugnell  
James Cook University,  
Townsville, QLD 4810  
jan.strugnell.jcu.edu.au

and

Prof. Oleg Simakov  
University of Vienna  
Universitätsring 1, 1010 Wien, Austria  
oleg.simakov@univie.ac.at

[Cairns](#)  
[Singapore](#)  
[Townsville](#)

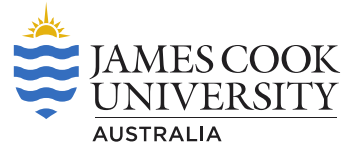

Dear Dr. Hongling Zhou

On behalf of my co-authors, I would like to thank you for the opportunity to revise and resubmit our research piece titled “*Adaptive venom evolution and toxicity in octopods is driven by extensive novel gene formation, expansion and loss*” (GIGA-D-20-00135).

We would also like thank all three reviewers for their constructive criticism and advice on how to improve our manuscript. All suggestions have been taken into account and incorporated resulting in a much-improved manuscript.

A response to reviewers has been provided in which we address each point providing the original text followed by the revised text, including line numbers where changes have been implemented. We also included a low resolution version of all corrected figures in the response.

Thank you again for your consideration of our revised manuscript

Yours sincerely,

Brooke L. Whitelaw  
James Cook University,  
Townsville, QLD 4810  
Mobile: 0424642621  
[brooke.whitelaw@my.jcu.edu.au](mailto:brooke.whitelaw@my.jcu.edu.au)

Assoc. Prof. Jan Strugnell  
James Cook University,  
Townsville, QLD 4810  
[jan.strugnell.jcu.edu.au](mailto:jan.strugnell.jcu.edu.au)

and

Prof. Oleg Simakov  
University of Vienna  
Universitätsring 1, 1010 Wien, Austria  
[oleg.simakov@univie.ac.at](mailto:oleg.simakov@univie.ac.at)
